# Supplementary material for: Decomposition of socioeconomic inequalities in child vaccination in Ethiopia: results from the 2011 and 2016 demographic and health surveys
Source: PubMed Central journal article supplement — BMJ Open. 2020 Oct 20;10(10):e039617. doi: 10.1136/bmjopen-2020-039617 (PMC7577064; doi:10.1136/bmjopen-2020-039617), 2020-10-20
Supplement: bmjopen-2020-039617.draft_revisions.pdf [file bmjopen-2020-039617.draft_revisions.pdf]

# BMJ Open

BMJ Open is committed to open peer review. As part of this commitment we make the peer review history of every article we publish publicly available.

When an article is published we post the peer reviewers' comments and the authors' responses online. We also post the versions of the paper that were used during peer review. These are the versions that the peer review comments apply to.

The versions of the paper that follow are the versions that were submitted during the peer review process. They are not the versions of record or the final published versions. They should not be cited or distributed as the published version of this manuscript.

BMJ Open is an open access journal and the full, final, typeset and author-corrected version of record of the manuscript is available on our site with no access controls, subscription charges or pay-per-view fees (<http://bmjopen.bmj.com>).

If you have any questions on BMJ Open's open peer review process please email [info.bmjopen@bmj.com](mailto:info.bmjopen@bmj.com)

# BMJ Open

## **Socioeconomic inequalities in full vaccination coverage among children aged 12-23 months in Ethiopia, 2011-2016: A decomposition approach**

|                               |                                                                                                                                                                                                        |
|-------------------------------|--------------------------------------------------------------------------------------------------------------------------------------------------------------------------------------------------------|
| Journal:                      | <i>BMJ Open</i>                                                                                                                                                                                        |
| Manuscript ID                 | bmjopen-2020-039617                                                                                                                                                                                    |
| Article Type:                 | Original research                                                                                                                                                                                      |
| Date Submitted by the Author: | 22-Apr-2020                                                                                                                                                                                            |
| Complete List of Authors:     | Bobo, Firew Tekle; Wollega University, Public health                                                                                                                                                   |
| Keywords:                     | Community child health < PAEDIATRICS, Public health < INFECTIOUS DISEASES, Health economics < HEALTH SERVICES ADMINISTRATION & MANAGEMENT, Health policy < HEALTH SERVICES ADMINISTRATION & MANAGEMENT |
|                               |                                                                                                                                                                                                        |

SCHOLARONE™  
Manuscripts

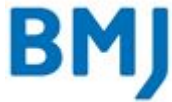

I, the Submitting Author has the right to grant and does grant on behalf of all authors of the Work (as defined in the below author licence), an exclusive licence and/or a non-exclusive licence for contributions from authors who are: i) UK Crown employees; ii) where BMJ has agreed a CC-BY licence shall apply, and/or iii) in accordance with the terms applicable for US Federal Government officers or employees acting as part of their official duties; on a worldwide, perpetual, irrevocable, royalty-free basis to BMJ Publishing Group Ltd ("BMJ") its licensees and where the relevant Journal is co-owned by BMJ to the co-owners of the Journal, to publish the Work in this journal and any other BMJ products and to exploit all rights, as set out in our [licence](#).

The Submitting Author accepts and understands that any supply made under these terms is made by BMJ to the Submitting Author unless you are acting as an employee on behalf of your employer or a postgraduate student of an affiliated institution which is paying any applicable article publishing charge ("APC") for Open Access articles. Where the Submitting Author wishes to make the Work available on an Open Access basis (and intends to pay the relevant APC), the terms of reuse of such Open Access shall be governed by a Creative Commons licence – details of these licences and which [Creative Commons](#) licence will apply to this Work are set out in our licence referred to above.

Other than as permitted in any relevant BMJ Author's Self Archiving Policies, I confirm this Work has not been accepted for publication elsewhere, is not being considered for publication elsewhere and does not duplicate material already published. I confirm all authors consent to publication of this Work and authorise the granting of this licence.

# Socioeconomic inequalities in full vaccination coverage among children aged 12-23 months in Ethiopia, 2011-2016: A decomposition approach

Firew Tekle Bobo<sup>1, 2\*</sup>

<sup>1</sup>Department of Public Health, Institute of Health, Wollega University; Nekemte, Oromia, Ethiopia

<sup>2</sup>School of Public Health, Faculty of Health, University of Technology Sydney, Sydney, New South Wales, Australia

\*corresponding

Email

[free11messi@gmail.com](mailto:free11messi@gmail.com)

## Abstract

**Objectives:** Monitoring and addressing unnecessary and avoidable differences in child vaccination is a critical global concern. This study aimed to assess socioeconomic inequalities in full vaccination coverage among children aged 12-23 months in Ethiopia.

**Design, setting and participants:** Secondary analyses of cross-sectional data from the two most recent (2011 and 2016) Ethiopia Demographic and Health Surveys were performed. This analysis included 1930 mother-child pairs in 2011 and 2004 mother-child pairs in 2016.

**Outcome measures:** Full vaccination status was defined based on whether a child received a single dose of Bacille Calmette Guerin (BCG), three doses diphtheria, tetanus toxoids, and pertussis (DTP3), three doses of polio vaccine, and one dose of measles vaccine.

**Methods:** The concentration curve and concentration index (CCI) were used to estimate wealth related to inequalities. The concentration indices were also decomposed to examine the contributing factors to socioeconomic inequalities in childhood vaccination.

**Results:** From 2011 to 2016, the proportion of children who received full vaccination increased from 24.6% (95% confidence interval, CI: 21.4 to 28.0) to 38.6% (95% CI: 34.6 to 42.9). While coverage of BCG, DPT, and polio immunization increased during the study period, the uptake of measles vaccine decreased. The positive concentration index shows that full vaccination status was favourably concentrated among children from wealthier households CCI= 0.212 in 2011 and CCI= 0.212 in 2016. The decomposition analysis shows that maternal health services such as family planning and antenatal care, socioeconomic status, exposure to media, urban-rural residence, and maternal education explain inequalities in full vaccination coverage in Ethiopia.

**Conclusions:** Childhood vaccination coverage was low in Ethiopia. Vaccination was less likely in poorer than in richer households. Addressing wealth inequalities, enhancing education, and improving maternal health service coverage will reduce socioeconomic inequalities in full vaccination uptake in Ethiopia.

**Keywords:** Inequality, Immunization, Vaccination, Socioeconomic factors, Ethiopia

## Strengths and limitations

- This study used two most recent (2011 and 2016) nationally representative Demographic and Health Surveys.
- The decomposition of the contributing factors that drive socioeconomic inequalities in vaccination status provided a rich set of analysis for policy interventions to address socioeconomic disparities in child vaccination in Ethiopia.
- Limitations of the current study may include recall bias related to vaccination status as not all children had vaccination cards, and measures had to depend on the mother's verbal report.
- The DHS is a cross-sectional survey; it was not possible to establish temporality between childhood vaccination and explanatory factors, precluding causal inference.

## Introduction

Vaccination is an important public health intervention that helps prevent 2 to 3 million child deaths each year (1). With improved coverage, vaccines have the potential to save many more children, which is why it is necessary to ensure that all children receive full vaccination (2, 3).

In the last two decades, global basic vaccination coverage has improved remarkably (4, 5). However, there are inequalities in access to childhood vaccination and many children do not receive the basic vaccines worldwide (6, 7). These disparities in vaccination coverage exist within and between countries, and in some places; the difference is larger (6).

Many children in some regions of the world continue to receive lower coverage. The World Health Organization (WHO) report in 2019 shows that 19.4 million children under the age of one year did not receive basic vaccines; around 60% of these children live in 10 nations, including Nigeria, the Democratic Republic of the Congo and Ethiopia (1).

Complete lack or incomplete childhood vaccination remains the cause of millions of preventable child deaths each year in many countries (1). Previous studies in the area suggest that there exists a social gradient in child vaccination within countries (8-10). For example, increased vaccination coverage was favorably concentrated among children whose parents are well-educated, wealthy or living in urban areas.

Inequalities in access to health services need to be effectively assessed, monitored, and intervened to address systematically missed population groups (11, 12). Measuring inequalities in full vaccination coverage can reveal where gaps lie in routinely delivered vaccines and provide valuable information to introduce effective strategies and policies to address such inequalities.

Although there are previous studies (13-15) in Ethiopia that have addressed factors associated with childhood vaccination, there is no study that examined trends and socioeconomic inequalities in childhood vaccination. The objective of this study is to examine trends and socioeconomic inequalities in childhood vaccination. Moreover, the paper assesses factors that explain socioeconomic inequalities in childhood vaccination in the country using a decomposition approach.

## Methods

### Data

The most recent (2011 and 2016) Ethiopia Demographic and Health Surveys (EDHS) were analysed. The Ethiopian Central Statistical Agency (CSA) undertook the surveys in collaboration with the DHS program (16). The DHS surveys are nationally representative household surveys with large sample sizes and high response rates (17). The Demographic Health and Survey () uses a stratified, two-stage sampling technique to obtain the study participants (18). Standardised questionnaires are used across time and countries to ensure collected data are comparable (19). Sampling methods and design have been described elsewhere (20). For the purpose of this study, data collected on vaccination status of children aged 12-23 months were extracted and analyzed. The Ethiopia DHS included information on 11,872 births/women in 2011 and 11,023 births/women in 2016. The sample used for the current analysis was limited to children aged 12–23 months at the time of the survey, yielding a final sample of 1930 mother-child pairs in 2011, and 2004 mother-child pairs in 2016.

### Measures

The dependent variable is a binary variable indicating whether a child received full vaccination that include eight recommended basic vaccines (21). The vaccines include one dose of Bacille Calmette Guerin (BCG) against tuberculosis, three doses of trivalent, tetravalent or pentavalent – vaccine against diphtheria, tetanus toxoids and pertussis (DTP3), three doses of polio vaccine, and one dose of measles vaccine. Vaccination status of children was collected from two sources; primarily immunization record cards provided by mothers were considered. In the absence of vaccination cards, mothers' verbal reports of children's immunization status were collected.

### Independent variables

The WHO Commission on Social Determinants of Health framework (22) was used to assess contributing factors of inequalities in vaccination status. In addition, factors identified in the current literature (8, 9, 23-25) on child vaccination that are available in the DHS surveys were included. The independent variables considered in the current study include 1) maternal and household factors: maternal parity, age, education levels, wealth status, and the use of maternal health services, 2) exposure to media, and 3) place of residence – urban/rural status.



1  
2  
3 The wealth index is a composite variable that measures the woman's household living standards.  
4  
5 It is constructed by collecting and analysing information on ownership of selected materials and  
6  
7 assets, such as radio, television, refrigerator, and vehicle; materials used for housing  
8  
9 construction; and types of sanitation facilities and water access. Households were ranked into  
10  
11 five quintiles (poorest, poorer, middle, richer and richest) depending on their level of wealth.  
12

13 Education levels of the mothers were grouped in three categories (no education, primary, and  
14  
15 secondary or higher). Exposure to media: frequency of listening to radio and watching television  
16  
17 (TV): both categorised as (not at all, less than once a week, and once a week or more). Utilization  
18  
19 of reproductive and maternal health services considered in the current study include use of  
20  
21 contraceptive, antenatal care contacts, and delivery at the health facility.  
22

### 23 Statistical analysis

24  
25 Socioeconomic inequalities in the coverage of vaccination status were estimated using the  
26  
27 concentration curve and concentration index (26). The concentration curve is a plot of the  
28  
29 cumulative percentage of the population, ranked by wealth status, from the poorest to the  
30  
31 richest (x-axis) against the cumulative percentage of the health variable (vaccination status) on  
32  
33 the y-axis. If all children had an equal proportion of vaccination status regardless of their  
34  
35 socioeconomic status, then the curve would coincide with the 45° line, which indicates the  
36  
37 presence of equality in the coverage of vaccination. If the concentration curve falls below the 45°  
38  
39 line of equality, it indicates that the uptake of vaccines is more concentrated among the rich. The  
40  
41 opposite is true if the curve falls above the line of equality.  
42

43 The concentration index is described as two times the area between the line of equality and the  
44  
45 concentration curve. The index takes a value between -1 and +1; an index of 0 indicates the  
46  
47 presence of equality in the uptake of vaccines. If wealth related inequalities exist, it can be seen  
48  
49 in one of the two forms, the first is when there is uneven concentration of vaccine uptake among  
50  
51 the rich, and in this case, the concentration index takes on a positive value. The second is negative  
52  
53 value concentration index, which implies high concentration of vaccination status among the  
54  
55 poor.  
56  
57

The concentration index (CCI) can be computed as follows:

$$CCI = \frac{2}{y} cov(h, r), \quad (1)$$

where  $h$  is the healthcare outcome of interest (vaccination status),  $l$  is the mean of  $h$  and  $r$  is the fractional rank of an individual in the wealth distribution. 95% CIs will be used to assess statistical significance of the concentration index.

## Decomposing inequality

The concentration curve and concentration index can only show and quantify the level of inequalities related to wealth in the use of health services. However, policymakers are also interested in the factors that contribute to socioeconomic inequalities in vaccination coverage. This can be done using an approach forwarded by Wagstaff and colleagues (27). The concentration index of a health variable can be decomposed into the contributions of individual factors to wealth-related health inequality. If we consider a linear regression model for the child vaccination status,  $v$ , is defined according to  $k$  explanatory factors,  $x_k$  as:

$$v = \alpha + \sum_k \beta_k x_k + \varepsilon, \quad (2)$$

where  $\alpha$  and  $\beta$  are parameters, and  $\varepsilon$  is the error term. The concentration index for child vaccination status can be decomposed as:

$$C = \sum_k \left( \frac{\beta_k \bar{x}_k}{\mu} \right) C_k + \frac{GC_\varepsilon}{\mu}, \quad (3)$$

where  $\mu$  is the mean of  $y$ ,  $\bar{x}_k$  is the mean of  $x_k$ ,  $C_k$  is the concentration index for  $x_k$ , (defined analogously to  $C$ ), and  $GC_\varepsilon$  is the generalized concentration index for the error term ( $\varepsilon$ ). Equation 2 shows that  $C$  is equal to a weighted sum of the concentration indices of the  $k$  regressors, where the weight for  $x_k$  is the elasticity of  $y$  with respect to  $x_k$  ( $\eta_k = \beta_k \frac{\bar{x}_k}{\mu}$ ). The residual component—captured by the last term ( $\frac{GC_\varepsilon}{\mu}$ )—reflects the wealth-related inequality in health that is not explained by systematic variation in the regressors.

1  
2  
3 All analysis were performed after adjusting for sampling design (stratification and clustering) and  
4 sampling weights. STATA (version 14, StataCorp, College Station, Tex) and SPSS (version 26)  
5 software packages were used to perform data analysis.  
6  
7  
8

### 9 Patient and public involvement

10 Patients/public were not involved in the design or implementation of this study.  
11  
12

## 13 Results

14  
15  
16 The sample used for the current analysis was limited to children aged 12–23 months at the time  
17 of the survey, yielding a final sample of 1930 mother-child pairs in 2011, and 2004 mother-child  
18 pairs in 2016. The majority (more than 85%) of respondents were from rural areas on both  
19 surveys, and more than 42% were from Oromia, which is the biggest region in the country. The  
20 percentage of mothers who had no education decreased from 68% in 2011 to 64% in 2016 while  
21 antenatal care contacts increased from 42% in 2011 to 60% in 2016 (Table 1).  
22  
23  
24  
25  
26

### 27 Trends of vaccination coverage

28  
29  
30 Vaccination coverage showed improvements from 2011 to 2016; BCG vaccine uptake increased  
31 from 66% to 69%, DTP3 vaccine from 37% to 57%, Polio 3 vaccine from 45% to 57%, and full  
32 vaccination coverage from 24% in 2011 to 38% in 2016. However, measles vaccine coverage  
33 decreased from 56% in 2011 to 54% in 2016, while the proportion of children who received no  
34 vaccination increased from 14% in 2011 to 16% in 2016 (Figure 1).  
35  
36  
37  
38  
39

40  
41 The urban/rural differential in full vaccination coverage increased from almost 28% in 2011 to  
42 more than 29% in 2016 (Table 1). Coverage remained low but showed slight increases from 2011  
43 to 2016 in regions such as Afar (8.5% to 15.2%), Somali (17.1% to 21.8%), and Oromia (15.6% to  
44 24.7%). Full vaccination coverage also showed disparities between and within the regions of  
45 Ethiopia (Table 1). For example, in 2016, coverage was 89.2% (95% CI: 82.0%, 93.8%) and 67.3%  
46 (95% CI: 57.6%, 75.7%) among children living in Addis Ababa and Tigray regions respectively,  
47  
48  
49  
50  
51  
52  
53  
54  
55  
56  
57  
58  
59  
60

Table 1 Full vaccination coverage by maternal and child characteristics in Ethiopia (DHS 2011 – 2016)

| Study variables                  | 2011   |         |                                     | P-value          | 2016   |         |                                     | P-value          |
|----------------------------------|--------|---------|-------------------------------------|------------------|--------|---------|-------------------------------------|------------------|
|                                  | Number | Percent | Received full immunization (95% CI) |                  | Number | Percent | Received full immunization (95% CI) |                  |
| <b>Sex of child</b>              |        |         |                                     | <b>0.268</b>     |        |         |                                     | <b>0.252</b>     |
| Male                             | 1010   | 52.3    | 23.1 (19.3, 27.5)                   |                  | 926    | 46.2    | 36.5 (31.2, 42.1)                   |                  |
| Female                           | 920    | 47.7    | 26.1 (22.0, 30.7)                   |                  | 1078   | 53.8    | 40.5 (35.4, 45.8)                   |                  |
| <b>Parity</b>                    |        |         |                                     | <b>0.101</b>     |        |         |                                     | <b>0.002</b>     |
| 1                                | 358    | 18.6    | 30.1 (23.3, 37.9)                   |                  | 372    | 18.6    | 45.3 (37.7, 53.1)                   |                  |
| 2                                | 318    | 16.5    | 26.7 (20.7, 33.7)                   |                  | 322    | 16.0    | 47.1 (39.0, 55.3)                   |                  |
| 3                                | 306    | 15.9    | 22.8 (17.1, 29.8)                   |                  | 282    | 14.1    | 40.4 (31.9, 49.5)                   |                  |
| 4                                | 230    | 11.9    | 24.4 (18.1, 32.0)                   |                  | 243    | 12.1    | 39.5 (31.4, 48.2)                   |                  |
| 5                                | 220    | 11.4    | 15.3 (9.9, 22.8)                    |                  | 216    | 10.8    | 30.1 (21.5, 40.3)                   |                  |
| 6                                | 497    | 25.7    | 23.8 (17.5, 31.6)                   |                  | 569    | 28.4    | 28.7 (22.3, 36.2)                   |                  |
| <b>Maternal age</b>              |        |         |                                     | <b>0.992</b>     |        |         |                                     | <b>0.197</b>     |
| 15-24                            | 518    | 26.8    | 24.6 (19.6, 30.4)                   |                  | 499    | 24.9    | 37.9 (31.6, 44.7)                   |                  |
| 25-29                            | 649    | 33.6    | 23.8 (19.3, 29.1)                   |                  | 596    | 29.7    | 44.1 (37.1, 51.4)                   |                  |
| 30-34                            | 386    | 20.0    | 24.7 (19.0, 31.5)                   |                  | 456    | 22.7    | 35.1 (28.7, 42.1)                   |                  |
| 35-39                            | 251    | 13.0    | 26.0 (18.9, 34.5)                   |                  | 295    | 14.7    | 33.5 (25.7, 42.4)                   |                  |
| 40-49                            | 127    | 6.6     | 24.8 (16.0, 36.2)                   |                  | 158    | 7.9     | 39.9 (29.3, 51.5)                   |                  |
| <b>Contraceptive use</b>         |        |         |                                     | <b>&lt;0.001</b> |        |         |                                     | <b>&lt;0.001</b> |
| Never used                       | 1106   | 57.3    | 17.9 (14.5, 21.8)                   |                  | 932    | 46.5    | 25.8 (21.3, 30.8)                   |                  |
| Using or used before             | 824    | 42.7    | 33.5 (28.8, 38.5)                   |                  | 1072   | 53.5    | 49.8 (44.3, 55.4)                   |                  |
| <b>Antenatal care contact</b>    |        |         |                                     | <b>&lt;0.001</b> |        |         |                                     | <b>&lt;0.001</b> |
| No                               | 1040   | 53.9    | 14.8 (11.6, 18.6)                   |                  | 711    | 35.5    | 18.6 (13.8, 24.4)                   |                  |
| Yes                              | 815    | 42.2    | 37.3 (32.7, 42.1)                   |                  | 1194   | 59.6    | 50.8 (45.7, 55.8)                   |                  |
| <b>Place child was delivered</b> |        |         |                                     | <b>&lt;0.001</b> |        |         |                                     | <b>&lt;0.001</b> |
| Home                             | 1694   | 87.8    | 20.6 (17.5, 24.1)                   |                  | 1309   | 65.3    | 30.6 (25.9, 35.6)                   |                  |
| Health facility                  | 236    | 12.2    | 52.7 (43.3, 62.0)                   |                  | 695    | 34.7    | 53.8 (47.6, 60.0)                   |                  |

1  
2  
3  
4  
5  
6  
7  
8  
9  
10  
11  
12  
13  
14  
15  
16  
17  
18  
19  
20  
21  
22  
23  
24  
25  
26  
27  
28  
29  
30  
31  
32  
33  
34  
35  
36  
37  
38  
39  
40  
41  
42  
43  
44  
45  
46  
47

|                                            |      |      |                   |                  |      |      |                   |
|--------------------------------------------|------|------|-------------------|------------------|------|------|-------------------|
| <b>Maternal educational levels</b>         |      |      |                   | <b>&lt;0.001</b> |      |      | <b>&lt;0.001</b>  |
| No education                               | 1307 | 67.7 | 20.4 (16.9, 24.5) |                  | 1257 | 62.7 | 30.9 (26.6, 35.6) |
| Primary                                    | 522  | 27.0 | 28.5 (23.6, 33.9) |                  | 577  | 28.8 | 46.1 (39.8, 52.5) |
| Secondary or higher                        | 102  | 5.3  | 57.3 (44.7, 69.0) |                  | 170  | 8.5  | 70.5 (55.9, 81.8) |
| <b>Household wealth index in quintiles</b> |      |      |                   | <b>&lt;0.001</b> |      |      | <b>&lt;0.001</b>  |
| Poorest                                    | 441  | 22.9 | 16.8 (12.0, 23.0) |                  | 504  | 25.2 | 22.2 (16.1, 29.8) |
| Poorer                                     | 419  | 21.7 | 18.7 (13.9, 24.7) |                  | 396  | 19.8 | 38.1 (30.7, 46.1) |
| Middle                                     | 394  | 20.4 | 18.7 (13.8, 24.7) |                  | 450  | 22.4 | 37.1 (30.1, 44.7) |
| Richer                                     | 369  | 19.1 | 25.1 (18.7, 32.7) |                  | 366  | 18.3 | 44.6 (36.4, 53.0) |
| Richest                                    | 307  | 15.9 | 50.7 (41.5, 59.8) |                  | 288  | 14.4 | 63.0 (52.0, 72.8) |
| <b>Place of residence</b>                  |      |      |                   | <b>&lt;0.001</b> |      |      | <b>&lt;0.001</b>  |
| Urban                                      | 274  | 14.2 | 48.2 (38.8, 57.8) |                  | 232  | 11.6 | 64.6 (51.1, 76.2) |
| Rural                                      | 1656 | 85.8 | 20.6 (17.4, 24.3) |                  | 1772 | 88.4 | 35.2 (31.1, 39.6) |
| <b>Regions</b>                             |      |      |                   | <b>&lt;0.001</b> |      |      | <b>&lt;0.001</b>  |
| Tigray                                     | 129  | 6.7  | 59.3 (50.7, 67.5) |                  | 152  | 7.6  | 67.3 (57.6, 75.7) |
| Afar                                       | 18   | 0.9  | 8.6 (4.9, 14.6)   |                  | 20   | 1.0  | 15.2 (8.0, 26.9)  |
| Amhara                                     | 446  | 23.1 | 27.1 (20.0, 35.6) |                  | 364  | 18.2 | 46.4 (36.7, 56.4) |
| Oromia                                     | 811  | 42.0 | 15.6 (11.1, 21.3) |                  | 881  | 44.0 | 24.7 (18.9, 31.6) |
| Somali                                     | 51   | 2.6  | 17.1 (10.2, 27.2) |                  | 76   | 3.8  | 21.8 (13.8, 32.7) |
| Benishangul-Gumuz                          | 23   | 1.2  | 24.2 (16.8, 33.5) |                  | 21   | 1.0  | 57.4 (47.1, 67.2) |
| Southern Nations, Nationalities and People | 391  | 20.2 | 24.1 (18.0, 31.4) |                  | 419  | 20.9 | 46.9 (38.5, 55.5) |
| Gambela                                    | 8    | 0.4  | 17.4 (8.7, 31.8)  |                  | 5    | 0.3  | 41.1 (30.3, 52.9) |
| Harari                                     | 5    | 0.3  | 36.1 (27.3, 46.0) |                  | 5    | 0.2  | 42.2 (31.1, 54.0) |
| Addis Ababa                                | 43   | 2.2  | 78.7 (69.1, 85.9) |                  | 52   | 2.6  | 89.2 (82.0, 93.8) |
| Dire Dawa                                  | 7    | 0.4  | 59.4 (49.3, 68.8) |                  | 9    | 0.5  | 75.9 (64.2, 84.6) |

## Inequalities in vaccination coverage

Inequalities in child vaccination persisted during 2011 and 2016: full vaccination status was favourably concentrated among children from wealthier households while the distribution of those who received no vaccination remained pro-poor (Figure 2). The uptake of BCG, DTP3, Polio 3, measles, and full vaccination were disproportionately concentrated among children from wealthy households during 2011 and 2016 (Figure 3). DTP3 and full vaccination status had lower coverage and showed the highest inequalities during 2011 and 2016; for example, in 2016, DTP3 had concentration index of (CCI= 0.175) and full vaccination (CCI= 0.172). The estimate for the distribution of children who received no vaccination in 2011 was (CCI= -0.092), this increased to (CCI= -0.184) in 2016 (Figure 3). The negative values for children who received no vaccination confirms pro-poor distributions. Increased vaccination coverage decreased inequalities as vaccinations such as BCG, Polio 3, and measles that had higher coverage showed lower inequalities (Figure 3).

The decomposition results in Table 2 and Figure 4 show that the significant contributors to socioeconomic inequality in full vaccination status included, wealth, maternal education, contraceptive use, antenatal care contacts, exposure to media that include radio and television, and place of residence (rural).

The decomposition analysis showed similar patterns in factors that explain socioeconomic inequalities in child vaccination status on both surveys. The use of maternal health services had the highest significant contributions to socioeconomic inequalities in child vaccination. Antenatal care contacts had 45.4% contribution in 2011 and 50.4% in 2016. Wealth status is the other significant contributor, 23.9% in 2011 and 21.2% in 2016. On the other hand, rural residence had negative contribution to socioeconomic inequalities in child vaccination on both surveys.

The overall concentration index for full child vaccination was positive, any significant positive contributor in Table 2 and Figure 4 means that socioeconomic inequality in full vaccination would have been less pro-rich if: (i) the contributing variables (e.g. antenatal care contacts or wealth) were to be evenly distributed among the rich and poor. Negative contributing variables (e.g. rural

1  
2  
3  
4  
5  
6  
7  
8  
9  
10  
11  
12  
13  
14  
15  
16  
17  
18  
19  
20  
21  
22  
23  
24  
25  
26  
27  
28  
29  
30  
31  
32  
33  
34  
35  
36  
37  
38  
39  
40  
41  
42  
43  
44  
45  
46  
47  
48  
49  
50  
51  
52  
53  
54  
55  
56  
57  
58  
59  
60

residence) would cause the opposite effect. The residual or unexplained contributing factors to socioeconomic inequalities in full vaccination account for 34.5% in 2011 and -12% in 2016.

For peer review only

Table 2 Decomposition of socioeconomic inequalities in full vaccination coverage in Ethiopia, (DHS 2011, 2016)

| Study variables                     | 2011            |                     |                       |                         | 2016            |                     |                       |                         |
|-------------------------------------|-----------------|---------------------|-----------------------|-------------------------|-----------------|---------------------|-----------------------|-------------------------|
|                                     | Marginal effect | Concentration index | Absolute contribution | Percentage contribution | Marginal effect | Concentration index | Absolute contribution | Percentage contribution |
| <b>Sex of child</b>                 |                 |                     |                       |                         |                 |                     |                       |                         |
| Male                                | (Base)          | (Base)              | (Base)                | (Base)                  | (Base)          | (Base)              | (Base)                | (Base)                  |
| Female                              | 0.022           | 0.035               | 0.001                 | 0.4                     | 0.043           | 0.034               | 0.001                 | 0.6                     |
| <b>Maternal age</b>                 |                 |                     |                       |                         |                 |                     |                       |                         |
| 15-24                               | (Base)          | (Base)              | (Base)                | (Base)                  | (Base)          | (Base)              | (Base)                | (Base)                  |
| 25-29                               | 0.052           | 0.049               | 0.003                 | 1.2                     | 0.562           | 0.073               | 0.006                 | 2.2                     |
| 30-34                               | 0.072           | -0.006              | 0.000                 | -0.2                    | 0.058           | -0.030              | -0.002                | -0.7                    |
| 35-39                               | 0.060           | -0.052              | -0.003                | -1.5                    | 0.052           | 0.006               | 0.000                 | 0.1                     |
| 40-49                               | 0.023           | 0.019               | 0.000                 | 0.2                     | 0.057           | -0.009              | -0.001                | -0.2                    |
| <b>Maternal parity</b>              |                 |                     |                       |                         |                 |                     |                       |                         |
| 1                                   | (Base)          | (Base)              | (Base)                | (Base)                  | (Base)          | (Base)              | (Base)                | (Base)                  |
| 2                                   | -0.004          | -0.042              | 0.000                 | 0.1                     | 0.037           | 0.066               | 0.002                 | 0.9                     |
| 3                                   | -0.033          | 0.020               | -0.001                | -0.3                    | 0.014           | -0.009              | 0.000                 | 0.0                     |
| 4                                   | -0.021          | -0.015              | 0.000                 | 0.1                     | 0.016           | -0.034              | -0.001                | -0.2                    |
| 5                                   | -0.068          | -0.012              | 0.001                 | 0.4                     | -0.030          | 0.008               | 0.000                 | -0.1                    |
| 6                                   | -0.034          | -0.048              | 0.002                 | 0.8                     | -0.070          | -0.123              | 0.009                 | 3.2                     |
| <b>Pattern of contraceptive use</b> |                 |                     |                       |                         |                 |                     |                       |                         |
| Never                               | (Base)          | (Base)              | (Base)                | (Base)                  | (Base)          | (Base)              | (Base)                | (Base)                  |
| Using or used before                | 0.091           | 0.348               | 0.032                 | 15.2                    | 0.235           | 0.322               | 0.076                 | 28.5                    |
| <b>Antenatal care contact</b>       |                 |                     |                       |                         |                 |                     |                       |                         |
| No                                  | (Base)          | (Base)              | (Base)                | (Base)                  | (Base)          | (Base)              | (Base)                | (Base)                  |
| Yes                                 | 0.242           | 0.390               | 0.094                 | 45.4                    | 0.566           | 0.237               | 0.134                 | 50.4                    |
| <b>Place child was delivered</b>    |                 |                     |                       |                         |                 |                     |                       |                         |
| Home                                | (Base)          | (Base)              | (Base)                | (Base)                  | (Base)          | (Base)              | (Base)                | (Base)                  |
| Health facility                     | 0.030           | 0.323               | 0.010                 | 4.6                     | 0.027           | 0.371               | 0.010                 | 3.7                     |



1  
2  
3  
4  
5  
6  
7  
8  
9  
10  
11  
12  
13  
14  
15  
16  
17  
18  
19  
20  
21  
22  
23  
24  
25  
26  
27  
28  
29  
30  
31  
32  
33  
34  
35  
36  
37  
38  
39  
40  
41  
42  
43  
44  
45  
46  
47

**Frequency of listening to radio**

|                       |        |        |        |        |        |        |        |        |
|-----------------------|--------|--------|--------|--------|--------|--------|--------|--------|
| Not at all            | (Base) |
| Less than once a week | -0.031 | 0.104  | -0.003 | -1.6   | 0.049  | 0.127  | 0.006  | 2.3    |
| At least once a week  | 0.026  | 0.232  | 0.006  | 2.9    | 0.045  | 0.219  | 0.010  | 3.7    |

**Frequency of watching television**

|                       |        |        |        |        |        |        |        |        |
|-----------------------|--------|--------|--------|--------|--------|--------|--------|--------|
| Not at all            | (Base) |
| Less than once a week | -0.035 | 0.066  | -0.002 | -1.1   | -0.008 | 0.120  | -0.001 | -0.3   |
| At least once a week  | 0.042  | 0.223  | 0.009  | 4.5    | 0.007  | 0.286  | 0.002  | 0.7    |

**Education levels**

|                     |        |        |        |        |        |        |        |        |
|---------------------|--------|--------|--------|--------|--------|--------|--------|--------|
| No education        | (Base) |
| Primary             | -0.005 | 0.182  | -0.001 | -0.4   | 0.070  | 0.127  | 0.009  | 3.3    |
| Secondary or higher | -0.001 | 0.152  | 0.000  | 0.0    | 0.028  | 0.235  | 0.007  | 2.5    |

**Place of residence**

|       |        |        |        |        |        |        |        |        |
|-------|--------|--------|--------|--------|--------|--------|--------|--------|
| Urban | (Base) |
| Rural | 0.143  | -0.426 | -0.061 | -29.2  | 0.080  | -0.323 | -0.026 | -9.8   |

**Household wealth index in quintiles**

|          |        |        |        |        |        |        |        |        |
|----------|--------|--------|--------|--------|--------|--------|--------|--------|
| Poorest  | (Base) |
| Poorer   | 0.005  | -0.283 | -0.001 | -0.7   | 0.094  | -0.236 | -0.022 | -8.3   |
| Middle   | -0.015 | 0.078  | -0.001 | -0.6   | 0.061  | 0.110  | 0.007  | 2.5    |
| Richer   | 0.032  | 0.375  | 0.012  | 5.8    | 0.070  | 0.387  | 0.027  | 10.2   |
| Richest  | 0.076  | 0.535  | 0.040  | 19.4   | 0.091  | 0.492  | 0.045  | 16.8   |
| Residual |        |        |        | 34.6   |        |        |        | -12.1  |
| Total    |        |        |        | 65.4   |        |        |        | 112.1  |

## Discussion

This study examined inequalities in full vaccination coverage among children aged 12-23 months in Ethiopia. The uptake of full vaccination increased from 24.6% in 2011 to 38.6% in 2016. Coverage improvements from 2011 to 2016 were observed in BCG vaccine uptake by 3%, DTP3 by 16.2%, Polio 3 by 11.5%, and full vaccination by 14%. However, Ethiopia remains one of the top ten high priority countries in the world where children remain unvaccinated (1).

The uptake of BCG, DTP3, Polio 3, measles, and full vaccination were disproportionately concentrated among children from wealthier households. The coverage of DTP3 and full vaccination showed the highest inequalities favouring children from wealthy households. More than 14% of children received none of the vaccines during 2011 and 2016. These children were mainly from disadvantaged households; for example, children who remained unvaccinated in 2016 were 8.3% among the richest quantile, while 24% were from the poorest quantile. Full vaccination coverage also showed significant variations across regions of the country; this ranged from 15% in Afar, and 21% in Somali, to 67.3% in Tigray, and 89.2% in Addis Ababa. Afar and Somali regions are predominantly nomadic pastoralist areas, with relatively weaker health systems compared to Tigray, and Addis Ababa that have improved healthcare coverage (28).

Ensuring access to all recommended vaccines for all children, regardless of sociodemographic or socioeconomic status, saves more lives and facilitates progress towards achieving sustainable development goals (SDGs) (29). SDG target for child mortality aims to reduce neonatal mortality to lower than 12 deaths per 1,000 live births and under-5 mortality to lower than 25 deaths per 1,000 live births across all countries (29). In 2016, the infant mortality rate was 48 deaths per 1,000 live births, and the under-5 mortality rate was 67 deaths per 1,000 live births in Ethiopia (16).

Findings of the current study revealed that the use of maternal health services, maternal education, exposure to media, and wealth had positive contributions to full vaccination uptake. These findings align with other similar studies (10, 24, 30). Maternal knowledge about vaccinations has been identified as a determinant for vaccination status, which may be associated with increased knowledge about benefits of child vaccination because of counselling during

1  
2  
3 family planning, and antenatal care contacts (31, 32). Moreover, based on findings related to the  
4 impact of residence and access to health facilities on vaccination, it may be that a mother with  
5 regular access to family planning and antenatal care is also more likely to seek out postnatal care  
6 where vaccination of her child can be more readily provided (33).  
7  
8  
9

10  
11 In the present study, maternal education had contributions to vaccine uptake in 2016, but this  
12 was not the case in 2011. Education helps to create improved awareness and knowledge about  
13 childhood vaccination (32). Previous studies have also indicated that educated women are more  
14 likely to take their child for vaccination (8, 32). Exposure to media can also be a useful tool to  
15 reach population at different socioeconomic levels. The findings of this study showed that access  
16 to mass media (radio and TV) favourably influences vaccine uptake. Transmitting information  
17 about the importance of childhood vaccination is vital to reach not only mothers but also their  
18 partners and community leaders (34). Information dissemination that targets mother's partner  
19 and community leaders can help to create a conducive environment that can favourably  
20 influence mothers to vaccinate their children.  
21  
22  
23  
24  
25  
26  
27  
28  
29

30  
31 In the present study, the socioeconomic well-being of mothers was associated with higher  
32 vaccination uptake. While vaccinations are provided free of charge in many developing countries,  
33 mothers sometimes incur indirect costs, for example, transportation costs, which often limit their  
34 uptake of these services (4). Mothers at the lower wealth categories are more likely to experience  
35 challenges in accessing healthcare facilities and transportation barriers as such less likely to take  
36 their child for vaccination (24).  
37  
38  
39  
40  
41

42  
43 Children from rural areas had lower vaccination coverage compared to children from urban  
44 areas. In 2011, full vaccination coverage was 48.2% in urban areas while it was 20.6% in rural  
45 areas. This pattern continued in 2016, as 64.6% of children from urban areas had full vaccination,  
46 but only 35.2% in rural areas. This finding is consistent with those of similar studies (24, 35). This  
47 could partly be explained by challenges faced in rural areas due to less developed health  
48 infrastructure and fewer skilled providers (36). In rural areas, long-distance to health facilities is  
49 another reason for low full vaccination coverage. People live far away from health facilities and  
50  
51  
52  
53  
54  
55  
56  
57

1  
2  
3 the long-distance, and lack of transportation poses a critical challenge for mothers to take their  
4 child for vaccination (36).  
5  
6

7  
8 Vaccines require cold chain management as it is sensitive to high temperatures (37). Health  
9 facilities in rural areas face a shortage of electric power supply to keep the cold chain equipment  
10 working, which could lead to cancellation of services as lack of cold chain equipment may result  
11 in the stock-out of vaccines (10). One study from Nigeria found that 47% of solar fridges for  
12 vaccine storage in eight states were broken (38).  
13  
14  
15

### 16 17 18 **Conclusions**

19 The coverage of full vaccination improved by 14 % from 2011 to 2016, but the overall coverage  
20 remained low. Increased vaccine coverage was disproportionately concentrated among children  
21 from wealthy households, while the majority of children who had no vaccination were from  
22 disadvantaged households. Utilisation of reproductive and maternal health services, household  
23 income status, and maternal education had significant positive contributions to improved  
24 vaccination status. Therefore, continued efforts at improving coverage of family planning,  
25 antenatal care contacts, institutional delivery, maternal education, and socioeconomic well-  
26 being are required to improve vaccination status. Moreover, regions such as Afar, Somali, and  
27 Oromia, and rural areas of the country at large require targeting.  
28  
29  
30  
31  
32  
33  
34  
35  
36  
37  
38  
39  
40  
41  
42  
43  
44  
45  
46  
47  
48  
49  
50  
51  
52  
53  
54  
55  
56  
57

## Acknowledgements:

FTB is grateful to ICF International for implementing the MEASURE DHS and making the data available for public use. United States Agency for International Development (USAID) funded the MEASURE DHS project.

## Funding:

There was no particular funding received for this study.

## Competing interests:

None declared

## Patient consent for publication:

Not required

## Ethics approval:

The Ethiopian Ministry of Science and Technology and Institutional Review Board of ICF International approved the original survey. Survey participants were informed about the objective and duration of the interviews. They were also notified that participation was voluntary, and that they could withdraw from the study at any time if they wished to do so.

## Contributors

FTB is the single author of the paper

**Data availability statement:** The dataset was made available for public use after de-identification (data are available online at: <https://www.idhsdata.org/idhs/>)

## References

1. World Health Organization. Immunization coverage 2019. <https://www.who.int/news-room/fact-sheets/detail/immunization-coverage> [accessed January 19, 2019].
2. Arsenault C, Harper S, Nandi A, Mendoza Rodriguez JM, Hansen PM, Johri M. Monitoring equity in vaccination coverage: A systematic analysis of demographic and health surveys from 45 Gavi-supported countries. *Vaccine*. 2017;35(6):951-9.
3. Arsenault C, Harper S, Nandi A, Rodriguez JM, Hansen PM, Johri M. An equity dashboard to monitor vaccination coverage. *Bull World Health Organ*. 2017;95(2):128-34.
4. Organization WH. State of Inequality: Reproductive Maternal Newborn and Child Health: Interactive Visualization of Health Data: World Health Organization; 2015.
5. Victora CG, Requejo JH, Barros AJ, Berman P, Bhutta Z, Boerma T, et al. Countdown to 2015: a decade of tracking progress for maternal, newborn, and child survival. 2016;387(10032):2049-59.
6. Arsenault C, Johri M, Nandi A, Mendoza Rodriguez JM, Hansen PM, Harper S. Country-level predictors of vaccination coverage and inequalities in Gavi-supported countries. *Vaccine*. 2017;35(18):2479-88.
7. Hosseinpour AR, Bergen N, Schlottheuber A, Gacic-Dobo M, Hansen PM, Senouci K, et al. State of inequality in diphtheria-tetanus-pertussis immunisation coverage in low-income and middle-income countries: a multicountry study of household health surveys. *The Lancet Global Health*. 2016;4(9):e617-e26.
8. Acharya K, Paudel YR, Dharel D. The trend of full vaccination coverage in infants and inequalities by wealth quintile and maternal education: analysis from four recent demographic and health surveys in Nepal. *BMC Public Health*. 2019;19(1).
9. Hajizadeh M. Decomposing socioeconomic inequality in child vaccination in the Gambia, the Kyrgyz Republic and Namibia. *Vaccine*. 2019;37(44):6609-16.
10. McGavin ZA, Wagner AL, Carlson BF, Power LE, Eboreime E, Boulton ML. Childhood full and under-vaccination in Nigeria, 2013. *Vaccine*. 2018;36(48):7294-9.
11. Sachs JD. From millennium development goals to sustainable development goals. *The Lancet*. 2012;379(9832):2206-11.
12. Tangcharoensathien V, Mills A, Palu T. Accelerating health equity: the key role of universal health coverage in the Sustainable Development Goals. *BMC medicine*. 2015;13(1):101.
13. Mekonnen AG, Bayleyegn AD, Ayele ET. Immunization coverage of 12-23 months old children and its associated factors in Minjar-Shenkora district, Ethiopia: a community-based study. *BMC Pediatr*. 2019;19(1):198.
14. Tamirat KS, Sisay MM. Full immunization coverage and its associated factors among children aged 12-23 months in Ethiopia: further analysis from the 2016 Ethiopia demographic and health survey. *BMC Public Health*. 2019;19(1):1019.
15. Wondimu A, Cao Q, Wilschut JC, Postma MJ. Factors associated with the uptake of newly introduced childhood vaccinations in Ethiopia: the cases of rotavirus and pneumococcal conjugate vaccines. *BMC Public Health*. 2019;19(1):1656.
16. Central Statistical Agency (CSA) [Ethiopia], ICF. Ethiopia Demographic and Health Survey 2016.: Addis Ababa, Ethiopia, and Rockville, Maryland, USA: CSA and ICF; 2016.
17. The DHS Program. The DHS Overview. <https://dhsprogram.com/What-We-Do/Survey-Types/DHS.cfm>
18. The DHS Program. DHS Methodology. <https://dhsprogram.com/What-We-Do/Survey-Types/DHS-Methodology.cfm>.
19. The DHS Program. DHS Questionnaires. <https://dhsprogram.com/What-We-Do/Survey-Types/DHS-Questionnaires.cfm>.

20. Rutstein SO, Rojas G. Guide to DHS statistics. Calverton, MD: ORC Macro. 2006;38.
21. Restrepo-Mendez MC, Barros AJ, Wong KL, Johnson HL, Pariyo G, Franca GV, et al. Inequalities in full immunization coverage: trends in low- and middle-income countries. *Bull World Health Organ.* 2016;94(11):794-805B.
22. Solar O, Irwin A. A conceptual framework for action on the social determinants of health. 2010.
23. Ashish K, Nelin V, Raaijmakers H, Kim HJ, Singh C, Målqvist MJBotWHO. Increased immunization coverage addresses the equity gap in Nepal. 2017;95(4):261.
24. Ataguba JE, Ojo KO, Ichoku HE. Explaining socio-economic inequalities in immunization coverage in Nigeria. *Health Policy Plan.* 2016;31(9):1212-24.
25. Doherty E, Walsh B, O'Neill C. Decomposing socioeconomic inequality in child vaccination: results from Ireland. *Vaccine.* 2014;32(27):3438-44.
26. O'Donnell O, Van Doorslaer E, Wagstaff A, Lindelow M. Analyzing health equity using household survey data: a guide to techniques and their implementation: The World Bank; 2007.
27. Wagstaff A, Doorslaer vE, Watanabe N. On decomposing the causes of health sector inequalities with an application to malnutrition inequalities in Vietnam: The World Bank; 2001.
28. Federal Democratic Republic of Ethiopia [Ministry of Health]. Health Sector Transformation Plan (HSTP) 2015/16-2019/20 (2008-2012 EFY). Federal Democratic Republic of Ethiopia Ministry of Health; 2015.
29. UN. Transforming our world: the 2030 Agenda for Sustainable Development. Resolution A/RES/70/1. Adopted September, 2015. Geneva: United Nations, 2015. 2015.
30. Mbengue MAS, Sarr M, Faye A, Badiane O, Camara FBN, Mboup S, et al. Determinants of complete immunization among senegalese children aged 12-23 months: evidence from the demographic and health survey. *BMC Public Health.* 2017;17(1):630.
31. Bhutta ZA, Das JK, Bahl R, Lawn JE, Salam RA, Paul VK, et al. Can available interventions end preventable deaths in mothers, newborn babies, and stillbirths, and at what cost? *The Lancet.* 2014;384(9940):347-70.
32. Burroway R, Hargrove A. Education is the antidote: Individual- and community-level effects of maternal education on child immunizations in Nigeria. *Soc Sci Med.* 2018;213:63-71.
33. Kerber KJ, de Graft-Johnson JE, Bhutta ZA, Okong P, Starrs A, Lawn JE. Continuum of care for maternal, newborn, and child health: from slogan to service delivery. *Lancet.* 2007;370(9595):1358-69.
34. Zamawe CO, Banda M, Dube ANJBp, childbirth. The impact of a community driven mass media campaign on the utilisation of maternal health care services in rural Malawi. 2016;16(1):21.
35. Raza O, Lodhi FS, Morasae EK, Majdzadeh R. Differential achievements in childhood immunization across geographical regions of Pakistan: analysis of wealth-related inequality. *Int J Equity Health.* 2018;17(1):122.
36. Organization WH. State of inequality: childhood immunization. 2016.
37. Kartoglu U, Milstien J. Tools and approaches to ensure quality of vaccines throughout the cold chain. *Expert Rev Vaccines.* 2014;13(7):843-54.
38. Ophori EA, Tula MY, Azih AV, Okojie R, Ikpo PE. Current trends of immunization in Nigeria: prospect and challenges. *Trop Med Health.* 2014;42(2):67-75.

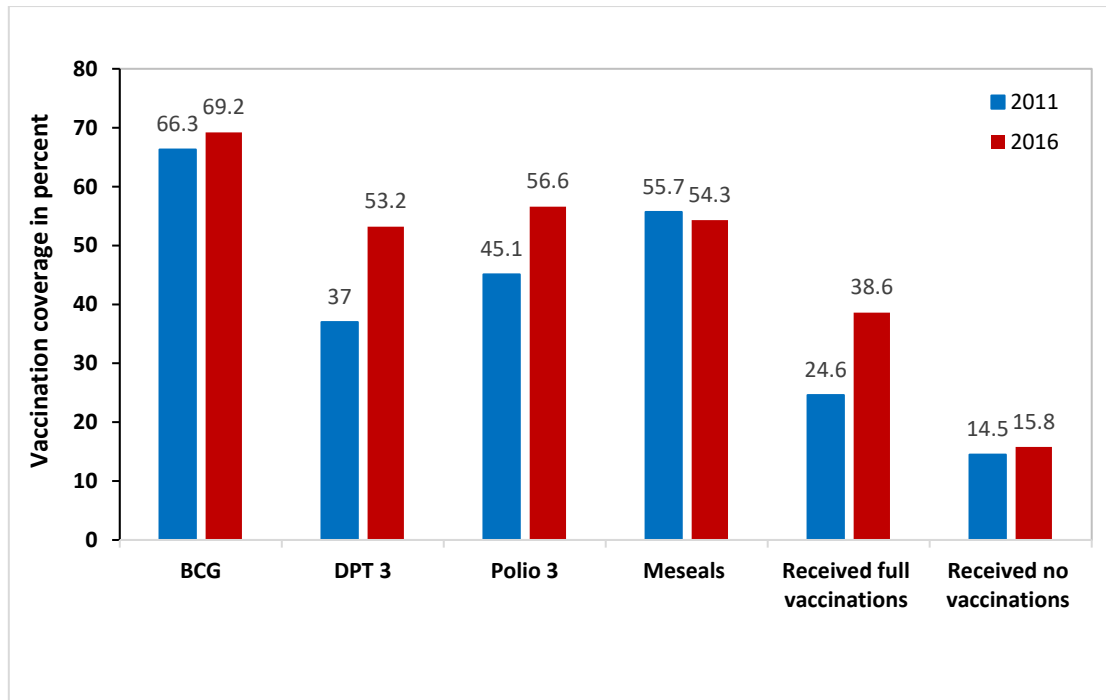

Figure 1 Vaccination coverage among children aged 12-23 months in Ethiopia (DHS 2011, 2016).



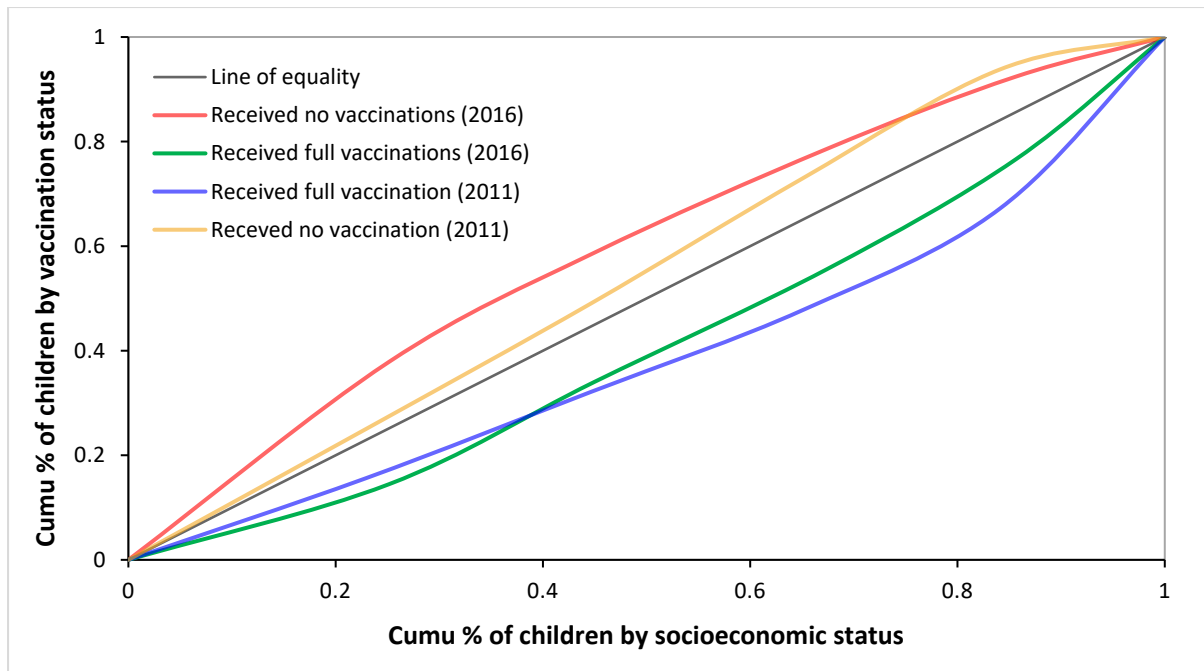

Figure 2 Concentration curves for child vaccination status, Ethiopia (DHS 2011, 2016)

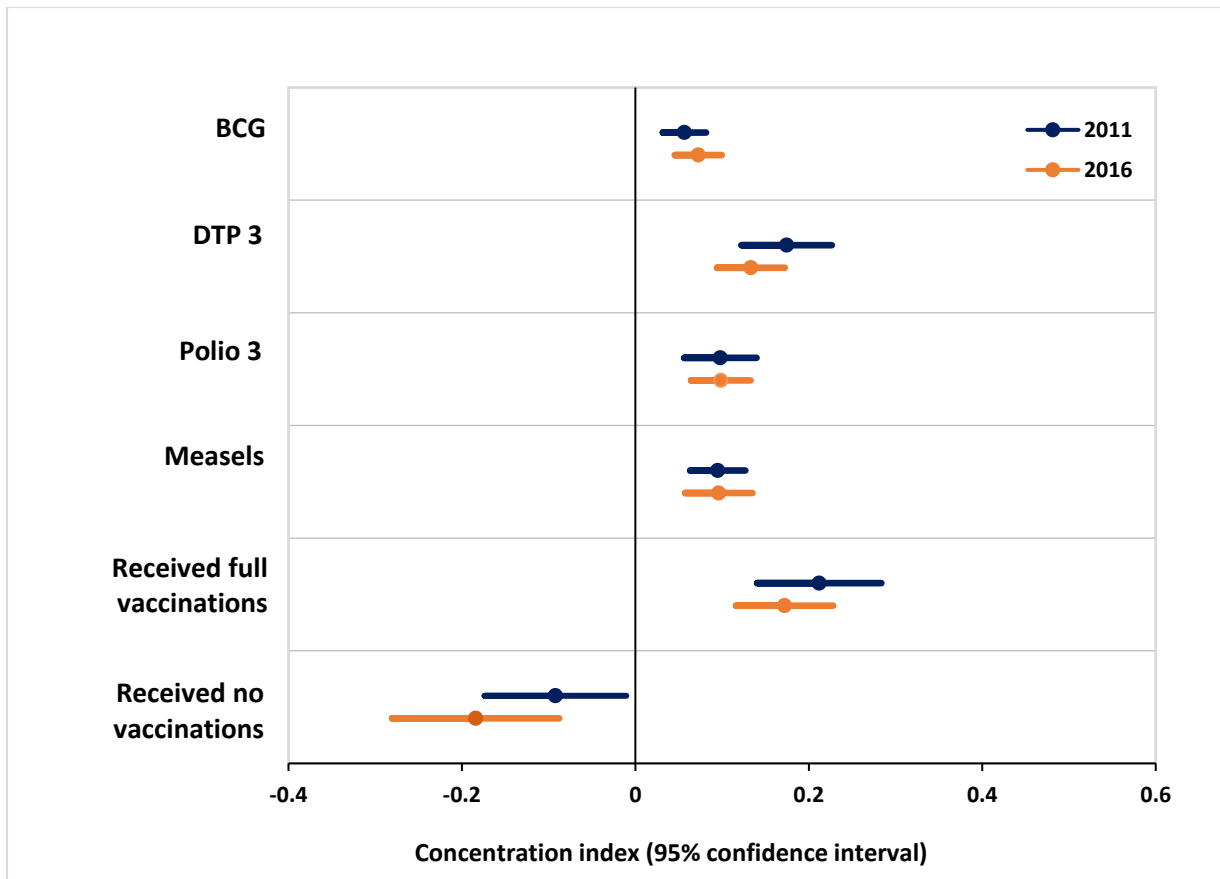

Figure 3 Concentration indices that shows socioeconomic inequalities in child vaccinations, Ethiopia (DHS 2011, 2016)

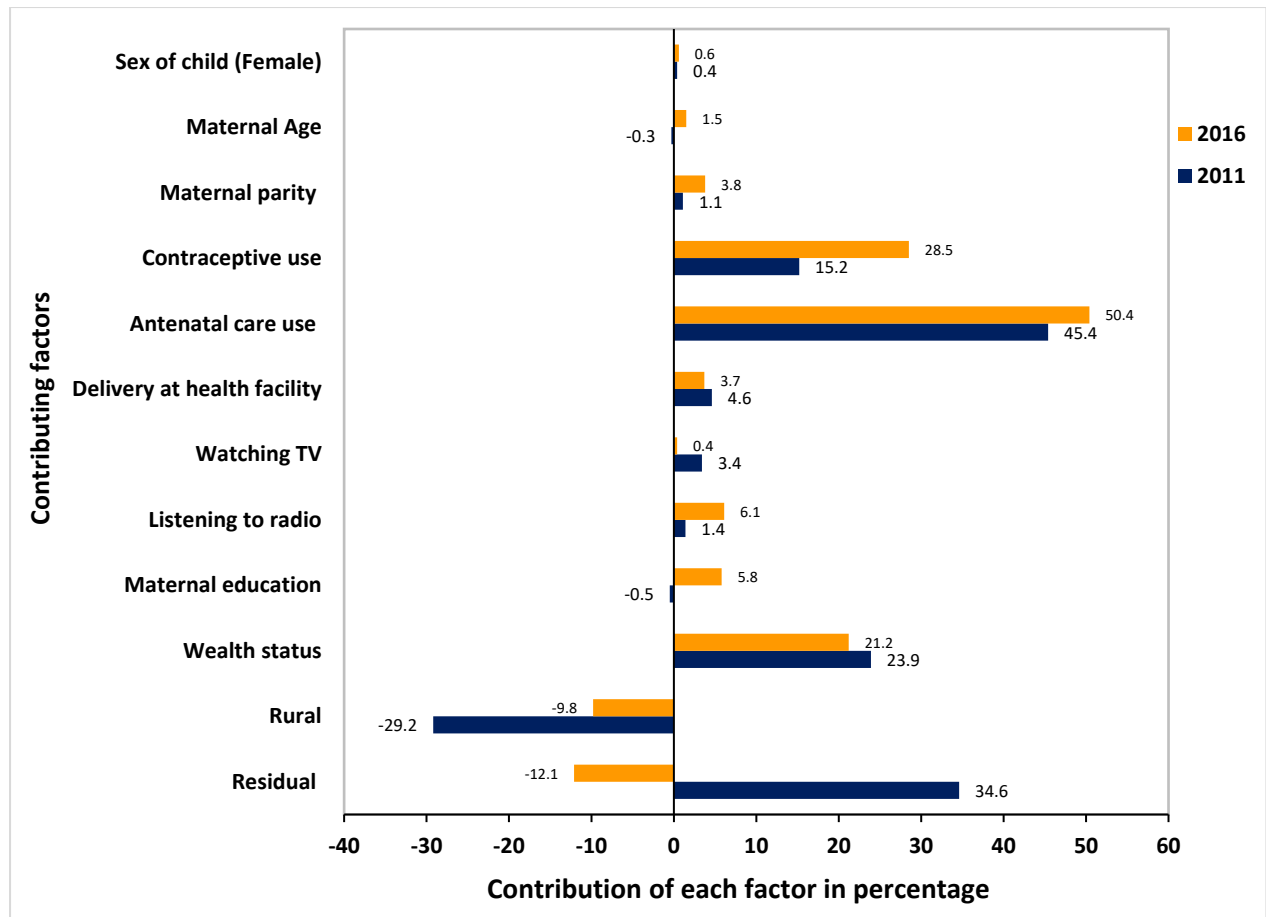

Figure 4 Percentage contributions of factors explaining socioeconomic inequalities in full vaccination coverage, Ethiopia (DHS 2011, 2016)

1  
2  
3 **Health Insurance Coverage and Associated Factors among Women in Ethiopia: A Secondary Analysis of Ethiopia**  
4 **Demographic and Health Survey Data 2016 – STROBE checklist**  
5

|                             | Page No | Recommendation                                                                                                                                                                                                                                                                                                                             |
|-----------------------------|---------|--------------------------------------------------------------------------------------------------------------------------------------------------------------------------------------------------------------------------------------------------------------------------------------------------------------------------------------------|
| <b>Title and abstract</b>   | 1 – 3   | (a) Indicate the study's design with a commonly used term in the title or the abstract<br>(b) Provide in the abstract an informative and balanced summary of what was done and what was found                                                                                                                                              |
| <b>Introduction</b>         |         |                                                                                                                                                                                                                                                                                                                                            |
| Background/rationale        | 4       | Explain the scientific background and rationale for the investigation being reported                                                                                                                                                                                                                                                       |
| Objectives                  | 4       | State specific objectives, including any prespecified hypotheses                                                                                                                                                                                                                                                                           |
| <b>Methods</b>              |         |                                                                                                                                                                                                                                                                                                                                            |
| Study design                | 5       | Present key elements of study design early in the paper                                                                                                                                                                                                                                                                                    |
| Setting                     | 5       | Describe the setting, locations, and relevant dates, including periods of recruitment, exposure, follow-up, and data collection                                                                                                                                                                                                            |
| Participants                | 5       | (a) Give the eligibility criteria, and the sources and methods of selection of Participants                                                                                                                                                                                                                                                |
| Variables                   | 5-6     | Clearly define all outcomes, exposures, predictors, potential confounders, and effect Modifiers. Give diagnostic criteria, if applicable                                                                                                                                                                                                   |
| Data sources/<br>measuremen | 5       | For each variable of interest, give sources of data and details of methods of assessment (measurement). Describe comparability of assessment methods if there is                                                                                                                                                                           |
| Bias                        | 7       | Describe any efforts to address potential sources of bias                                                                                                                                                                                                                                                                                  |
| Study size                  | 5       | Explain how the study size was arrived at                                                                                                                                                                                                                                                                                                  |
| Quantitative variables      | 5-6     | Explain how quantitative variables were handled in the analyses. If applicable, describe which groupings were chosen and why                                                                                                                                                                                                               |
| Statistical methods         | 6-7     | (a) Describe all statistical methods, including those used to control for confounding<br>(b) Describe any methods used to examine subgroups and interactions<br>(c) Explain how missing data were addressed<br>(d) If applicable, describe analytical methods taking account of sampling strategy<br>(e) Describe any sensitivity analyses |
| <b>Results</b>              |         |                                                                                                                                                                                                                                                                                                                                            |
| Participants                | 8       | (a) Report numbers of individuals at each stage of study—eg numbers potentially eligible, examined for eligibility, confirmed eligible, included in the study, completing follow-up, and analysed<br>(b) Give reasons for non-participation at each stage<br>(c) Consider use of a flow diagram                                            |
| Descriptive data            | 8-10    | (a) Give characteristics of study participants (eg demographic, clinical, social) and information on exposures and potential confounders<br>(b) Indicate number of participants with missing data for each variable of interest                                                                                                            |
| Outcome data                | 11-12   | Report numbers of outcome events or summary measures                                                                                                                                                                                                                                                                                       |
| Main results                | 10-14   | (a) Give unadjusted estimates and, if applicable, confounder-adjusted estimates and their precision (eg, 95% confidence interval). Make clear which confounders were<br>(b) Report category boundaries when continuous variables were categorized                                                                                          |

1  
2  
3  
4  
5  
6  
7  
8  
9  
10  
11  
12  
13  
14  
15  
16  
17  
18  
19  
20  
21  
22  
23  
24  
25  
26  
27  
28  
29  
30  
31  
32  
33  
34  
35  
36  
37  
38  
39  
40  
41  
42  
43  
44  
45  
46  
47  
48  
49  
50  
51  
52  
53  
54  
55  
56  
57  
58  
59  
60

|                          |       |                                                                                                                                                                            |
|--------------------------|-------|----------------------------------------------------------------------------------------------------------------------------------------------------------------------------|
|                          |       | (c) If relevant, consider translating estimates of relative risk into absolute risk for a meaningful time period                                                           |
| Other analyses           | N/A   | Report other analyses done—eg analyses of subgroups and interactions, and sensitivity analyses                                                                             |
| Discussion               |       |                                                                                                                                                                            |
| Key results              | 13-17 | Summarise key results with reference to study objectives                                                                                                                   |
| Limitations              | 3     | Discuss limitations of the study, taking into account sources of potential bias or                                                                                         |
| Interpretation           | 13-17 | Give a cautious overall interpretation of results considering objectives, limitations, multiplicity of analyses, results from similar studies, and other relevant evidence |
| Generalisability         | 3     | Discuss the generalisability (external validity) of the study results                                                                                                      |
| <b>Other information</b> | N/A   | Give the source of funding and the role of the funders for the present study and, if applicable, for the original study on which the present article is based              |
| Funding                  |       |                                                                                                                                                                            |

# BMJ Open

## Socioeconomic inequalities in child vaccination coverage in Ethiopia: A decomposition approach

|                                 |                                                                                                                                                                                                                                    |
|---------------------------------|------------------------------------------------------------------------------------------------------------------------------------------------------------------------------------------------------------------------------------|
| Journal:                        | <i>BMJ Open</i>                                                                                                                                                                                                                    |
| Manuscript ID                   | bmjopen-2020-039617.R1                                                                                                                                                                                                             |
| Article Type:                   | Original research                                                                                                                                                                                                                  |
| Date Submitted by the Author:   | 23-Jul-2020                                                                                                                                                                                                                        |
| Complete List of Authors:       | Bobo, Firew Tekle; Department of Public Health, Institute of Health Sciences, Wollega University<br>Hayen, Andrew; School of Public Health, Faculty of Health, University of Technology Sydney, Sydney, New South Wales, Australia |
| <b>Primary Subject Heading</b>: | Health economics                                                                                                                                                                                                                   |
| Secondary Subject Heading:      | Health economics, Health services research                                                                                                                                                                                         |
| Keywords:                       | Paediatric infectious disease & immunisation < PAEDIATRICS, Health economics < HEALTH SERVICES ADMINISTRATION & MANAGEMENT, Public health < INFECTIOUS DISEASES, Community child health < PAEDIATRICS                              |
|                                 |                                                                                                                                                                                                                                    |

SCHOLARONE™  
Manuscripts



I, the Submitting Author has the right to grant and does grant on behalf of all authors of the Work (as defined in the below author licence), an exclusive licence and/or a non-exclusive licence for contributions from authors who are: i) UK Crown employees; ii) where BMJ has agreed a CC-BY licence shall apply, and/or iii) in accordance with the terms applicable for US Federal Government officers or employees acting as part of their official duties; on a worldwide, perpetual, irrevocable, royalty-free basis to BMJ Publishing Group Ltd ("BMJ") its licensees and where the relevant Journal is co-owned by BMJ to the co-owners of the Journal, to publish the Work in this journal and any other BMJ products and to exploit all rights, as set out in our [licence](#).

The Submitting Author accepts and understands that any supply made under these terms is made by BMJ to the Submitting Author unless you are acting as an employee on behalf of your employer or a postgraduate student of an affiliated institution which is paying any applicable article publishing charge ("APC") for Open Access articles. Where the Submitting Author wishes to make the Work available on an Open Access basis (and intends to pay the relevant APC), the terms of reuse of such Open Access shall be governed by a Creative Commons licence – details of these licences and which [Creative Commons](#) licence will apply to this Work are set out in our licence referred to above.

Other than as permitted in any relevant BMJ Author's Self Archiving Policies, I confirm this Work has not been accepted for publication elsewhere, is not being considered for publication elsewhere and does not duplicate material already published. I confirm all authors consent to publication of this Work and authorise the granting of this licence.

# Socioeconomic inequalities in child vaccination coverage in Ethiopia: A decomposition approach

Firew Tekle Bobo <sup>1,2\*</sup> Andrew Hayen<sup>2</sup>

<sup>1</sup>Department of Public Health, Institute of Health, Wollega University; Nekemte, Oromia, Ethiopia

<sup>2</sup>School of Public Health, Faculty of Health, University of Technology Sydney, Sydney, New South Wales, Australia

\*corresponding

Email

[free11messi@gmail.com](mailto:free11messi@gmail.com)



## Abstract

**Objectives:** Monitoring and addressing unnecessary and avoidable differences in child vaccination is a critical global concern. This study aimed to assess socioeconomic inequalities in basic vaccination coverage among children aged 12-23 months in Ethiopia.

**Design, setting and participants:** Secondary analyses of cross-sectional data from the two most recent (2011 and 2016) Ethiopia Demographic and Health Surveys were performed. This analysis included 1930 mother-child pairs in 2011 and 2004 mother-child pairs in 2016.

**Outcome measures:** Completion of basic vaccinations was defined based on whether a child received a single dose of Bacille Calmette Guerin (BCG), three doses of diphtheria, tetanus toxoids, and pertussis (DTP), three doses of polio vaccine (OPV), and one dose of measles vaccine.

**Methods:** The concentration curve and concentration index (CCI) were used to estimate wealth related to inequalities. The concentration indices were also decomposed to examine the contributing factors to socioeconomic inequalities in childhood vaccination.

**Results:** From 2011 to 2016, the proportion of children who received basic vaccination increased from 24.6% (95% confidence interval, CI: 21.4 to 28.0) to 38.6% (95% CI: 34.6 to 42.9). While coverage of BCG, DPT, and polio immunization increased during the study period, the uptake of measles vaccine decreased. The positive concentration index shows that basic vaccination status was favourably concentrated among children from wealthier households CCI= 0.212 in 2011 and CCI= 0.212 in 2016. The decomposition analysis shows that maternal health services such as family planning and antenatal care, socioeconomic status, exposure to media, urban-rural residence, and maternal education explain inequalities in basic vaccination coverage in Ethiopia.

**Conclusions:** Childhood vaccination coverage was low in Ethiopia. Vaccination was less likely in poorer than in richer households. Addressing wealth inequalities, enhancing education, and improving maternal health service coverage will reduce socioeconomic inequalities in basic vaccination uptake in Ethiopia.

**Keywords:** Inequality, Immunization, Vaccination, Socioeconomic factors, Ethiopia

## Strengths and limitations

- This study used two most recent (2011 and 2016) nationally representative Demographic and Health Surveys (DHS).
- The decomposition of the contributing factors that drive socioeconomic inequalities in vaccination status provided a rich set of analysis for policy interventions to address socioeconomic disparities in child vaccination in Ethiopia.
- Limitations of the current study may include recall bias related to vaccination status as not all children had vaccination cards, and measures had to depend on the mother's verbal report.
- The DHS is a cross-sectional survey; it was not possible to establish temporality between childhood vaccination and explanatory factors, precluding causal inference.

## Introduction

Vaccination is an important public health intervention that helps prevent 2 to 3 million child deaths each year.<sup>1</sup> With improved coverage, vaccines have the potential to save many more children, which is why it is necessary to ensure that all children receive all recommended vaccines.<sup>2,3</sup>

In Ethiopia, a child is said to have received full vaccinations if they receive one dose of the Bacille Calmette-Guérin vaccine (BCG, for tuberculosis), three doses of the pentavalent vaccine (penta includes diphtheria, tetanus, pertussis [DTP], hepatitis B [HBV], and Haemophilus influenzae type b [Hib]), three doses of the oral polio vaccine (OPV), three doses of the pneumococcal conjugate vaccine (PCV), and two doses of the rotavirus vaccine (rota), and one dose of measles-containing vaccine (MCV).<sup>4,5</sup> Basic vaccination is defined as access to a single dose of BCG, three doses of DTP, three doses of OPV, and one dose of measles vaccine by the age of 12 months.<sup>4</sup>

In the last two decades, global basic vaccination coverage has improved remarkably.<sup>6,7</sup> In 2018, the proportion of the world's children who received three doses of the combined diphtheria, tetanus toxoid, and pertussis-containing vaccine (DTP3) reached 86% worldwide.<sup>1</sup> However, there are inequalities in access to childhood vaccination and many children do not receive the basic vaccines worldwide.<sup>8,9</sup>

Many regions of the world continue to have low coverage. The World Health Organization (WHO) report in 2019 shows that 19.4 million children under the age of one year did not receive basic vaccines; around 60% of these children live in 10 nations, including Nigeria, the Democratic Republic of the Congo and Ethiopia.<sup>1</sup> Disparities in vaccination coverage exist within and between countries, and in some places; the difference is more significant.<sup>8</sup> Within countries, inequalities in child vaccination data show that richer subgroups tend to have higher coverage whereas the coverage among poorer subgroups varies across countries. For example, studies in India<sup>10</sup>, Nigeria<sup>11</sup> and Brazil<sup>12</sup> indicated that children of mothers who had higher education levels and household wealth status are more likely receive higher vaccination coverage.

Complete lack or incomplete childhood vaccination remains the cause of millions of preventable child deaths each year in many countries.<sup>1</sup> Previous studies in the area suggest that there exists a social gradient in child vaccination within countries.<sup>13-15</sup> For example, increased vaccination

1  
2  
3 coverage was favorably concentrated among children whose parents are well-educated, wealthy  
4 or living in urban areas. Inequalities in access to child vaccination need to be effectively assessed,  
5 monitored, and intervened to address systematically missed population groups.<sup>16,17</sup> In 2019, only  
6 43% of children received all recommended vaccines while 19% received none of the vaccines<sup>18</sup>.  
7 This is way below WHO's 2020 goal of 90% coverage in every country<sup>19</sup>. Addressing these gaps  
8 requires measuring inequalities in basic vaccination coverage and identifying where gaps exist in  
9 routinely delivered vaccines and provide valuable information to introduce effective strategies  
10 and policies to address such inequalities. It is equally important those children who receive  
11 incomplete or no vaccines be identified to devise equity-oriented immunisation programs to  
12 reach disadvantaged populations and reduce Ethiopia's high levels of vaccine preventable  
13 childhood morbidity and mortality.

14  
15  
16 Although there are previous studies<sup>20-22</sup> in Ethiopia that have addressed factors associated with  
17 childhood vaccination, there is no study that examined trends and socioeconomic inequalities in  
18 childhood vaccination. The objective of this study is to examine trends and socioeconomic  
19 inequalities in childhood vaccination. Moreover, the paper assesses factors that explain  
20 socioeconomic inequalities in childhood vaccination in the country using a decomposition  
21 approach.  
22  
23  
24  
25  
26  
27  
28  
29  
30  
31  
32  
33  
34  
35  
36  
37  
38  
39  
40  
41  
42  
43  
44  
45  
46  
47  
48  
49  
50  
51  
52  
53  
54  
55  
56  
57

## Methods

### Data

We analysed the most recent (2011 and 2016) Ethiopia Demographic and Health Surveys . The Ethiopian Central Statistical Agency (CSA) undertook the surveys in collaboration with the DHS program.<sup>23</sup> The DHS are nationally representative household surveys with large sample sizes and high response rates.<sup>24</sup> The DHS uses a stratified, two-stage sampling technique to obtain the study participants.<sup>25</sup> Standardised questionnaires are used across time and countries to ensure collected data are comparable.<sup>26</sup> Sampling methods and design have been described elsewhere.<sup>27</sup> For the purpose of this study, data collected on vaccination status of children aged 12-23 months were extracted and analyzed. The Ethiopia DHS included information on 11,872 births/women in 2011 and 11,023 births/women in 2016. The sample used for the current analysis was limited to children aged 12–23 months at the time of the survey, yielding a final sample of 1930 mother-child pairs in 2011, and 2004 mother-child pairs in 2016.

### Measures

The dependent variable is whether a child received all basic vaccinations, that is the eight recommended basic vaccines.<sup>28</sup> The vaccines included one dose of Bacille Calmette Guerin (BCG) against tuberculosis, three doses of diphtheria, tetanus toxoids, and pertussis vaccine (DTP), three doses of oral polio vaccine (OPV), and one dose of measles vaccine. Table 1 shows immunization schedule for children under 12 months in Ethiopia.<sup>4</sup> The DHS determined the vaccination status of children from two sources. First, they considered the primary immunization record cards provided by mothers, but if these were absent, the DHS data collectors used mothers' verbal reports of children's immunization status.

Table 1 Basic vaccination schedule for children under 12 months in Ethiopia

| Vaccine | Diseases                       | Age                       |
|---------|--------------------------------|---------------------------|
| BCG     | Tuberculosis                   | At birth                  |
| DPT     | Diphtheria, Pertussis, Tetanus | 6, 10, 14 weeks           |
| OPV     | Polio                          | At birth, 6, 10, 14 weeks |
| Measles | Measles                        | 9 months                  |

The WHO Commission on Social Determinants of Health framework<sup>29</sup> was used to explain contributing factors of inequalities in vaccination status. In addition, factors identified in the

1  
2  
3 current literature <sup>11,13,14,30,31</sup> on child vaccination that are available in the DHS surveys were  
4 included. The independent variables considered in the current study include 1) maternal and  
5 household factors: maternal parity, age, education levels, wealth status, and the use of maternal  
6 health services, 2) exposure to media, and 3) place of residence – urban/rural status.  
7  
8  
9

10  
11 The wealth index is a composite variable that measures the woman's household living standards.  
12 It is constructed by collecting and analysing information on ownership of selected materials and  
13 assets, such as radio, television, refrigerator, and vehicle; materials used for housing  
14 construction; and types of sanitation facilities and water access. Households were ranked into  
15 five quintiles (poorest, poorer, middle, richer and richest) depending on their level of wealth.  
16  
17  
18  
19

20  
21 We grouped education levels of the mothers in to three categories (no education, primary, and  
22 secondary or higher). Exposure to media: frequency of listening to radio and watching television  
23 (TV): both categorised as (not at all, less than once a week, and once a week or more). Utilization  
24 of reproductive and maternal health services considered in the current study include use of  
25 contraceptive, antenatal care contacts, and delivery at the health facility.  
26  
27  
28  
29

### 30 31 Statistical analysis

32  
33 Socioeconomic inequalities in the coverage of vaccination status were estimated using the  
34 concentration curve and concentration index. <sup>32</sup> The concentration curve is a plot of the  
35 cumulative percentage of the population, ranked by wealth status, from the poorest to the  
36 richest (x-axis) against the cumulative percentage of the health variable (vaccination status) on  
37 the y-axis. If all children had an equal proportion of vaccination status regardless of their  
38 socioeconomic status, then the curve would coincide with the 45° line, which indicates the  
39 presence of equality in the coverage of vaccination. If the concentration curve falls below the 45°  
40 line of equality, it indicates that the uptake of vaccines is more concentrated among the rich. The  
41 opposite is true if the curve falls above the line of equality.  
42  
43  
44  
45  
46  
47  
48  
49

50  
51 The concentration index is described as two times the area between the line of equality and the  
52 concentration curve. The index takes a value between -1 and +1; an index of 0 indicates the  
53 presence of equality in the uptake of vaccines. If wealth related inequalities exist, it can be seen  
54  
55  
56  
57

in one of the two forms, the first is when there is uneven concentration of vaccine uptake among the rich, and in this case, the concentration index takes on a positive value. The second is negative value concentration index, which implies high concentration of vaccination status among the poor.

The concentration index (CCI) can be computed as follows:

$$CCI = \frac{2}{y} cov(h, r), \quad (1)$$

where  $h$  is the healthcare outcome of interest (i.e. vaccination status),  $y$  is the mean of  $h$  and  $r$  is the fractional rank of an individual in the wealth distribution. We also computed 95% CIs for the concentration index.

## Decomposing inequality

The concentration curve and concentration index can only show and quantify the level of inequalities related to wealth in the use of health services. However, policymakers are also interested in the factors that contribute to socioeconomic inequalities in vaccination coverage. This can be done using an approach developed by Wagstaff and colleagues.<sup>33</sup> The concentration index of a health variable can be decomposed into the contributions of individual factors to wealth-related health inequality. If we consider a linear regression model for the child's vaccination status,  $v$ , is defined according to  $k$  explanatory factors,  $x_k$  as.

$$v = \alpha + \sum_k \beta_k x_k + \varepsilon, \quad (2)$$

where  $\alpha$  and  $\beta$  are parameters, and  $\varepsilon$  is the error term. The concentration index for child vaccination status can be decomposed as:

$$C = \sum_k \left( \frac{\beta_k \bar{x}_k}{\mu} \right) C_k + \frac{GC_\varepsilon}{\mu}, \quad (3)$$

where  $\mu$  is the mean of  $y$ ,  $\bar{x}_k$  is the mean of  $x_k$ ,  $C_k$  is the concentration index for  $x_k$  (defined analogously to  $C$ ), and  $GC_\varepsilon$  is the generalized concentration index for the error term ( $\varepsilon$ ). Equation 3 shows that  $C$  is equal to a weighted sum of the concentration indices of the  $k$  regressors, where

1  
2  
3 the weight for  $x_k$  is the elasticity of  $y$  with respect to  $x_k$  ( $\eta_k = \beta_k \frac{\bar{x}_k}{\mu}$ ). The residual component—  
4 captured by the last term ( $\frac{GC_\varepsilon}{\mu}$ ) reflects the wealth-related inequality in health that is not  
5 explained by systematic variation in the regressors. We used the bootstrap method with 1000  
6 replications to estimate standard errors. All analysis were performed after adjusting for  
7 sampling design (stratification and clustering) and sampling weights. STATA (version 14,  
8 StataCorp, College Station, Tex) and SPSS (version 26) software packages were used to perform  
9 data analysis.

## 10 Patient and public involvement

11 Patients/public were not involved in the design or implementation of this study.

## 12 Results

13 The sample used for the current analysis was limited to children aged 12–23 months at the time  
14 of the survey, yielding a final sample of 1930 mother-child pairs in 2011, and 2004 mother-child  
15 pairs in 2016. The majority (85.8% and 88.4%) of respondents were from rural areas in 2011 and  
16 2016 surveys respectively, and more than 42% were from Oromia, which is the biggest region in  
17 the country. The percentage of mothers who had no education decreased from 68% in 2011 to  
18 64% in 2016 while antenatal care contacts increased from 42% in 2011 to 60% in 2016 (Table 2).

## 19 Trends of vaccination coverage

20 Vaccination coverage showed improvements from 2011 to 2016; BCG vaccine uptake increased  
21 from 66% to 69%, DTP3 vaccine from 37% to 57%, OPV3 vaccine from 45% to 57%, and basic  
22 vaccination coverage from 24% in 2011 to 38% in 2016. The proportion of children who received  
23 all basic vaccinations that include BCG, DTP3, OPV3, and measles increased by 14% from 2011 to  
24 2016. However, measles vaccine coverage decreased from 56% in 2011 to 54% in 2016, while the  
25 proportion of children who received no vaccination increased from 14% in 2011 to 16% in 2016  
26 (Figure 1).



1  
2  
3 The urban/rural differential in basic vaccination coverage increased from almost 28% in 2011 to  
4 more than 29% in 2016 (Table 2). Coverage remained low but showed slight increases from 2011  
5 to 2016 in regions such as Afar (8.5% to 15.2%), Somali (17.1% to 21.8%), and Oromia (15.6% to  
6 24.7%). Basic vaccination coverage also showed disparities between and within the regions of  
7 Ethiopia (Table 2). For example, in 2016, coverage was 89.2% (95% CI: 82.0%, 93.8%) and 67.3%  
8 (95% CI: 57.6%, 75.7%) among children living in Addis Ababa and Tigray regions respectively,  
9 whereas in Afar it was 15.2% (95% CI: 8.0%, 26.9%), and Somali 21.8% (95% CI: 13.8%, 32.7%).  
10  
11  
12  
13  
14  
15  
16  
17  
18  
19  
20  
21  
22  
23  
24  
25  
26  
27  
28  
29  
30  
31  
32  
33  
34  
35  
36  
37  
38  
39  
40  
41  
42  
43  
44  
45  
46  
47  
48  
49  
50  
51  
52  
53  
54  
55  
56  
57

Table 2 Basic vaccination coverage by maternal and child characteristics in Ethiopia (DHS 2011 – 2016)

| Study variables                  | 2011   |         |                                          |                  | 2016   |         |                                          |                  |
|----------------------------------|--------|---------|------------------------------------------|------------------|--------|---------|------------------------------------------|------------------|
|                                  | Number | Percent | Received all basic immunization (95% CI) | P-value          | Number | Percent | Received all basic immunization (95% CI) | P-value          |
| <b>Sex of child</b>              |        |         |                                          | <b>0.268</b>     |        |         |                                          | <b>0.252</b>     |
| Male                             | 1010   | 52.3    | 23.1 (19.3, 27.5)                        |                  | 926    | 46.2    | 36.5 (31.2, 42.1)                        |                  |
| Female                           | 920    | 47.7    | 26.1 (22.0, 30.7)                        |                  | 1078   | 53.8    | 40.5 (35.4, 45.8)                        |                  |
| <b>Parity</b>                    |        |         |                                          | <b>0.101</b>     |        |         |                                          | <b>0.002</b>     |
| 1                                | 358    | 18.6    | 30.1 (23.3, 37.9)                        |                  | 372    | 18.6    | 45.3 (37.7, 53.1)                        |                  |
| 2                                | 318    | 16.5    | 26.7 (20.7, 33.7)                        |                  | 322    | 16.0    | 47.1 (39.0, 55.3)                        |                  |
| 3                                | 306    | 15.9    | 22.8 (17.1, 29.8)                        |                  | 282    | 14.1    | 40.4 (31.9, 49.5)                        |                  |
| 4                                | 230    | 11.9    | 24.4 (18.1, 32.0)                        |                  | 243    | 12.1    | 39.5 (31.4, 48.2)                        |                  |
| 5                                | 220    | 11.4    | 15.3 (9.9, 22.8)                         |                  | 216    | 10.8    | 30.1 (21.5, 40.3)                        |                  |
| 6                                | 497    | 25.7    | 23.8 (17.5, 31.6)                        |                  | 569    | 28.4    | 28.7 (22.3, 36.2)                        |                  |
| <b>Maternal age</b>              |        |         |                                          | <b>0.992</b>     |        |         |                                          | <b>0.197</b>     |
| 15-24                            | 518    | 26.8    | 24.6 (19.6, 30.4)                        |                  | 499    | 24.9    | 37.9 (31.6, 44.7)                        |                  |
| 25-29                            | 649    | 33.6    | 23.8 (19.3, 29.1)                        |                  | 596    | 29.7    | 44.1 (37.1, 51.4)                        |                  |
| 30-34                            | 386    | 20.0    | 24.7 (19.0, 31.5)                        |                  | 456    | 22.7    | 35.1 (28.7, 42.1)                        |                  |
| 35-39                            | 251    | 13.0    | 26.0 (18.9, 34.5)                        |                  | 295    | 14.7    | 33.5 (25.7, 42.4)                        |                  |
| 40-49                            | 127    | 6.6     | 24.8 (16.0, 36.2)                        |                  | 158    | 7.9     | 39.9 (29.3, 51.5)                        |                  |
| <b>Contraceptive use</b>         |        |         |                                          | <b>&lt;0.001</b> |        |         |                                          | <b>&lt;0.001</b> |
| Never used                       | 1106   | 57.3    | 17.9 (14.5, 21.8)                        |                  | 932    | 46.5    | 25.8 (21.3, 30.8)                        |                  |
| Using or used before             | 824    | 42.7    | 33.5 (28.8, 38.5)                        |                  | 1072   | 53.5    | 49.8 (44.3, 55.4)                        |                  |
| <b>Antenatal care contact</b>    |        |         |                                          | <b>&lt;0.001</b> |        |         |                                          | <b>&lt;0.001</b> |
| No                               | 1040   | 53.9    | 14.8 (11.6, 18.6)                        |                  | 711    | 35.5    | 18.6 (13.8, 24.4)                        |                  |
| Yes                              | 815    | 42.2    | 37.3 (32.7, 42.1)                        |                  | 1194   | 59.6    | 50.8 (45.7, 55.8)                        |                  |
| <b>Place child was delivered</b> |        |         |                                          | <b>&lt;0.001</b> |        |         |                                          | <b>&lt;0.001</b> |
| Home                             | 1694   | 87.8    | 20.6 (17.5, 24.1)                        |                  | 1309   | 65.3    | 30.6 (25.9, 35.6)                        |                  |
| Health facility                  | 236    | 12.2    | 52.7 (43.3, 62.0)                        |                  | 695    | 34.7    | 53.8 (47.6, 60.0)                        |                  |

1  
2  
3  
4  
5  
6  
7  
8  
9  
10  
11  
12  
13  
14  
15  
16  
17  
18  
19  
20  
21  
22  
23  
24  
25  
26  
27  
28  
29  
30  
31  
32  
33  
34  
35  
36  
37  
38  
39  
40  
41  
42  
43  
44  
45  
46  
47

|                                            |      |      |                   |                  |      |      |                   |
|--------------------------------------------|------|------|-------------------|------------------|------|------|-------------------|
| <b>Maternal educational levels</b>         |      |      |                   | <b>&lt;0.001</b> |      |      | <b>&lt;0.001</b>  |
| No education                               | 1307 | 67.7 | 20.4 (16.9, 24.5) |                  | 1257 | 62.7 | 30.9 (26.6, 35.6) |
| Primary                                    | 522  | 27.0 | 28.5 (23.6, 33.9) |                  | 577  | 28.8 | 46.1 (39.8, 52.5) |
| Secondary or higher                        | 102  | 5.3  | 57.3 (44.7, 69.0) |                  | 170  | 8.5  | 70.5 (55.9, 81.8) |
| <b>Household wealth index in quintiles</b> |      |      |                   | <b>&lt;0.001</b> |      |      | <b>&lt;0.001</b>  |
| Poorest                                    | 441  | 22.9 | 16.8 (12.0, 23.0) |                  | 504  | 25.2 | 22.2 (16.1, 29.8) |
| Poorer                                     | 419  | 21.7 | 18.7 (13.9, 24.7) |                  | 396  | 19.8 | 38.1 (30.7, 46.1) |
| Middle                                     | 394  | 20.4 | 18.7 (13.8, 24.7) |                  | 450  | 22.4 | 37.1 (30.1, 44.7) |
| Richer                                     | 369  | 19.1 | 25.1 (18.7, 32.7) |                  | 366  | 18.3 | 44.6 (36.4, 53.0) |
| Richest                                    | 307  | 15.9 | 50.7 (41.5, 59.8) |                  | 288  | 14.4 | 63.0 (52.0, 72.8) |
| <b>Place of residence</b>                  |      |      |                   | <b>&lt;0.001</b> |      |      | <b>&lt;0.001</b>  |
| Urban                                      | 274  | 14.2 | 48.2 (38.8, 57.8) |                  | 232  | 11.6 | 64.6 (51.1, 76.2) |
| Rural                                      | 1656 | 85.8 | 20.6 (17.4, 24.3) |                  | 1772 | 88.4 | 35.2 (31.1, 39.6) |
| <b>Regions</b>                             |      |      |                   | <b>&lt;0.001</b> |      |      | <b>&lt;0.001</b>  |
| Tigray                                     | 129  | 6.7  | 59.3 (50.7, 67.5) |                  | 152  | 7.6  | 67.3 (57.6, 75.7) |
| Afar                                       | 18   | 0.9  | 8.6 (4.9, 14.6)   |                  | 20   | 1.0  | 15.2 (8.0, 26.9)  |
| Amhara                                     | 446  | 23.1 | 27.1 (20.0, 35.6) |                  | 364  | 18.2 | 46.4 (36.7, 56.4) |
| Oromia                                     | 811  | 42.0 | 15.6 (11.1, 21.3) |                  | 881  | 44.0 | 24.7 (18.9, 31.6) |
| Somali                                     | 51   | 2.6  | 17.1 (10.2, 27.2) |                  | 76   | 3.8  | 21.8 (13.8, 32.7) |
| Benishangul-Gumuz                          | 23   | 1.2  | 24.2 (16.8, 33.5) |                  | 21   | 1.0  | 57.4 (47.1, 67.2) |
| Southern Nations, Nationalities and People | 391  | 20.2 | 24.1 (18.0, 31.4) |                  | 419  | 20.9 | 46.9 (38.5, 55.5) |
| Gambela                                    | 8    | 0.4  | 17.4 (8.7, 31.8)  |                  | 5    | 0.3  | 41.1 (30.3, 52.9) |
| Harari                                     | 5    | 0.3  | 36.1 (27.3, 46.0) |                  | 5    | 0.2  | 42.2 (31.1, 54.0) |
| Addis Ababa                                | 43   | 2.2  | 78.7 (69.1, 85.9) |                  | 52   | 2.6  | 89.2 (82.0, 93.8) |
| Dire Dawa                                  | 7    | 0.4  | 59.4 (49.3, 68.8) |                  | 9    | 0.5  | 75.9 (64.2, 84.6) |

## Inequalities in vaccination coverage

Inequalities in child vaccination persisted during 2011 and 2016: basic vaccination status was favourably concentrated among children from wealthier households while the distribution of those who received no vaccination remained disproportionately concentrated among poor (Figure 2). The uptake of BCG, DTP3, OPV3, measles, and basic vaccination were disproportionately concentrated among children from wealthy households during 2011 and 2016 (Figure 3). DTP3 and basic vaccination status had lower coverage and showed the highest inequalities during 2011 and 2016; for example, in 2016, DTP3 had concentration index of (CCI= 0.175) and basic vaccination (CCI= 0.172). The estimate for the distribution of children who received no vaccination in 2011 was (CCI= -0.092), this increased to (CCI= -0.184) in 2016 (Figure 3). The negative values for children who received no vaccination confirms pro-poor distributions. Increased vaccination coverage decreased inequalities as vaccinations such as BCG, OPV3, and measles that had higher coverage showed lower inequalities (Figure 3).

The decomposition results in (Table 3) and (Figure 4) show that the significant contributors to socioeconomic inequality in basic vaccination status included, wealth, maternal education, contraceptive use, antenatal care contacts, exposure to media that include radio and television, and place of residence (rural).

The decomposition analysis showed similar patterns in factors that explain socioeconomic inequalities in child vaccination status on both surveys. The use of maternal health services had the highest significant contributions to socioeconomic inequalities in child vaccination. Antenatal care contacts had 45.4% contribution in 2011 and 50.4% in 2016. Wealth status is the other significant contributor, 23.9% in 2011 and 21.2% in 2016. On the other hand, rural residence had a negative contribution to socioeconomic inequalities in child vaccination on both surveys.

The overall concentration index for basic child vaccination was positive. Any significant positive contributor in (Table 3) and (Figure 4) means that socioeconomic inequality in basic vaccination would have been less pro-rich if: (i) the contributing variables (e.g. antenatal care contacts or wealth) were to be evenly distributed among the rich and poor. Negative contributing variables (e.g. rural residence) would cause the opposite effect. The residual or unexplained contributing

1  
2  
3  
4  
5  
6  
7  
8  
9  
10  
11  
12  
13  
14  
15  
16  
17  
18  
19  
20  
21  
22  
23  
24  
25  
26  
27  
28  
29  
30  
31  
32  
33  
34  
35  
36  
37  
38  
39  
40  
41  
42  
43  
44  
45  
46  
47  
48  
49  
50  
51  
52  
53  
54  
55  
56  
57  
58  
59  
60

factors to socioeconomic inequalities in basic vaccination account for 34.5% in 2011 and -12% in 2016.

For peer review only

Table 3 Decomposition of socioeconomic inequalities in basic vaccination coverage in Ethiopia, (DHS 2011, 2016)

| Study variables                     | 2011            |                     |                       |                         | 2016            |                     |                       |                         |
|-------------------------------------|-----------------|---------------------|-----------------------|-------------------------|-----------------|---------------------|-----------------------|-------------------------|
|                                     | Marginal effect | Concentration index | Absolute contribution | Percentage contribution | Marginal effect | Concentration index | Absolute contribution | Percentage contribution |
| <b>Sex of child</b>                 |                 |                     |                       |                         |                 |                     |                       |                         |
| Male                                | (Base)          | (Base)              | (Base)                | (Base)                  | (Base)          | (Base)              | (Base)                | (Base)                  |
| Female                              | 0.022           | 0.035               | 0.001                 | 0.4                     | 0.043           | 0.034               | 0.001                 | 0.6                     |
| <b>Maternal age</b>                 |                 |                     |                       |                         |                 |                     |                       |                         |
| 15-24                               | (Base)          | (Base)              | (Base)                | (Base)                  | (Base)          | (Base)              | (Base)                | (Base)                  |
| 25-29                               | 0.052*          | 0.049               | 0.003                 | 1.2                     | 0.562           | 0.073               | 0.006                 | 2.2                     |
| 30-34                               | 0.072*          | -0.006              | 0.000                 | -0.2                    | 0.058           | -0.030              | -0.002                | -0.7                    |
| 35-39                               | 0.060*          | -0.052              | -0.003                | -1.5                    | 0.052           | 0.006               | 0.000                 | 0.1                     |
| 40-49                               | 0.023           | 0.019               | 0.000                 | 0.2                     | 0.057*          | -0.009              | -0.001                | -0.2                    |
| <b>Maternal parity</b>              |                 |                     |                       |                         |                 |                     |                       |                         |
| 1                                   | (Base)          | (Base)              | (Base)                | (Base)                  | (Base)          | (Base)              | (Base)                | (Base)                  |
| 2                                   | -0.004          | -0.042              | 0.000                 | 0.1                     | 0.037           | 0.066               | 0.002                 | 0.9                     |
| 3                                   | -0.033          | 0.020               | -0.001                | -0.3                    | 0.014           | -0.009              | 0.000                 | 0.0                     |
| 4                                   | -0.021          | -0.015              | 0.000                 | 0.1                     | 0.016           | -0.034              | -0.001                | -0.2                    |
| 5                                   | -0.068          | -0.012              | 0.001                 | 0.4                     | -0.030          | 0.008               | 0.000                 | -0.1                    |
| 6                                   | -0.034          | -0.048              | 0.002                 | 0.8                     | -0.070          | -0.123              | 0.009                 | 3.2                     |
| <b>Pattern of contraceptive use</b> |                 |                     |                       |                         |                 |                     |                       |                         |
| Never                               | (Base)          | (Base)              | (Base)                | (Base)                  | (Base)          | (Base)              | (Base)                | (Base)                  |
| Using or used before                | 0.091**         | 0.348               | 0.032                 | 15.2                    | 0.235***        | 0.322               | 0.076                 | 28.5                    |
| <b>Antenatal care contact</b>       |                 |                     |                       |                         |                 |                     |                       |                         |
| No                                  | (Base)          | (Base)              | (Base)                | (Base)                  | (Base)          | (Base)              | (Base)                | (Base)                  |
| Yes                                 | 0.242***        | 0.390               | 0.094                 | 45.4                    | 0.566***        | 0.237               | 0.134                 | 50.4                    |
| <b>Place child was delivered</b>    |                 |                     |                       |                         |                 |                     |                       |                         |
| Home                                | (Base)          | (Base)              | (Base)                | (Base)                  | (Base)          | (Base)              | (Base)                | (Base)                  |
| Health facility                     | 0.030*          | 0.323               | 0.010                 | 4.6                     | 0.027*          | 0.371               | 0.010                 | 3.7                     |

1  
2  
3  
4  
5  
6  
7  
8  
9  
10  
11  
12  
13  
14  
15  
16  
17  
18  
19  
20  
21  
22  
23  
24  
25  
26  
27  
28  
29  
30  
31  
32  
33  
34  
35  
36  
37  
38  
39  
40  
41  
42  
43  
44  
45  
46  
47

**Frequency of listening to radio**

|                       |        |        |        |        |        |        |        |        |
|-----------------------|--------|--------|--------|--------|--------|--------|--------|--------|
| Not at all            | (Base) |
| Less than once a week | -0.031 | 0.104  | -0.003 | -1.6   | 0.049  | 0.127  | 0.006  | 2.3    |
| At least once a week  | 0.026* | 0.232  | 0.006  | 2.9    | 0.045  | 0.219  | 0.010  | 3.7    |

**Frequency of watching television**

|                       |        |        |        |        |        |        |        |        |
|-----------------------|--------|--------|--------|--------|--------|--------|--------|--------|
| Not at all            | (Base) |
| Less than once a week | -0.035 | 0.066  | -0.002 | -1.1   | -0.008 | 0.120  | -0.001 | -0.3   |
| At least once a week  | 0.042  | 0.223  | 0.009  | 4.5    | 0.007  | 0.286  | 0.002  | 0.7    |

**Education levels**

|                     |        |        |        |        |         |        |        |        |
|---------------------|--------|--------|--------|--------|---------|--------|--------|--------|
| No education        | (Base) | (Base) | (Base) | (Base) | (Base)  | (Base) | (Base) | (Base) |
| Primary             | -0.005 | 0.182  | -0.001 | -0.4   | 0.070** | 0.127  | 0.009  | 3.3    |
| Secondary or higher | -0.001 | 0.152  | 0.000  | 0.0    | 0.028** | 0.235  | 0.007  | 2.5    |

**Place of residence**

|       |        |        |        |        |        |        |        |        |
|-------|--------|--------|--------|--------|--------|--------|--------|--------|
| Urban | (Base) |
| Rural | 0.143  | -0.426 | -0.061 | -29.2  | 0.080  | -0.323 | -0.026 | -9.8   |

**Household wealth index in quintiles**

|          |          |        |        |        |         |        |        |        |
|----------|----------|--------|--------|--------|---------|--------|--------|--------|
| Poorest  | (Base)   | (Base) | (Base) | (Base) | (Base)  | (Base) | (Base) | (Base) |
| Poorer   | 0.005    | -0.283 | -0.001 | -0.7   | 0.094** | -0.236 | -0.022 | -8.3   |
| Middle   | -0.015*  | 0.078  | -0.001 | -0.6   | 0.061** | 0.110  | 0.007  | 2.5    |
| Richer   | 0.032**  | 0.375  | 0.012  | 5.8    | 0.070** | 0.387  | 0.027  | 10.2   |
| Richest  | 0.076*** | 0.535  | 0.040  | 19.4   | 0.091** | 0.492  | 0.045  | 16.8   |
| Residual |          |        |        | 34.6   |         |        |        | -12.1  |
| Total    |          |        |        | 65.4   |         |        |        | 112.1  |

\* indicates <p 0.05; \*\* indicates p < 0.01; \*\*\* indicates p < 0.001

## Discussion

This study examined inequalities in vaccination coverage among children aged 12-23 months in Ethiopia. The uptake of all basic vaccinations increased from 24.6% in 2011 to 38.6% in 2016. Coverage improvements from 2011 to 2016 were observed in BCG vaccine uptake by 3%, DTP3 by 16.2%, OPV3 by 11.5%, and all basic vaccinations by 14%. While there were improvements in vaccination coverage from 2011 to 2016, issues that need to be address include a lack of awareness about vaccination, facilities' limited operating hours, maternal time constraints, and the distance to facilities <sup>34,35</sup>.

Ethiopia remains one of the top ten high priority countries in the world where children remain unvaccinated <sup>1</sup>. In the current study, more than 15% of children received none of the vaccines, while incomplete vaccinations were 62% in 2011 and 46% in 2016. Possible explanations for under vaccination or no vaccination may include vaccine hesitancy or refusal, lack of access to vaccination services, or missed opportunities <sup>5</sup>. Vaccine hesitancy refers to concerns about real or perceived vaccine adverse events among parents that may lead to delayed vaccination schedules or refusal of vaccinations altogether <sup>36</sup>. Missed opportunities present another explanation in which children may not receive one or all of recommended vaccines even if they are vaccine-eligible and can attend health facilities, which is commonly refers to missed opportunities <sup>5,36</sup>.

The uptake of BCG, DTP3, OPV3, measles, and receipt of all basic vaccinations were disproportionately concentrated among children from wealthier households. This finding is consistent with multi country studies across low-middle income countries.<sup>9,37</sup> However, a study across three countries <sup>14</sup> that include Gambia, Kyrgyz Republic, and Namibia showed that receipt of all basic vaccinations was disproportionately concentrated among children from poor households. The coverage of DTP3 and basic vaccination showed the highest inequalities favouring children from wealthy households. More than 14% of children received none of the vaccines during 2011 and 2016. These children were mainly from disadvantaged households; for example, children who remained unvaccinated in 2016 were 8.3% among the richest quantile, while 24% were from the poorest quantile. Basic vaccination coverage also showed significant



1  
2  
3 variations across regions of the country; this ranged from 15% in Afar, and 21% in Somali, to  
4 67.3% in Tigray, and 89.2% in Addis Ababa. Afar and Somali regions are predominantly nomadic  
5 pastoralist areas, with relatively weaker health systems compared to Tigray, and Addis Ababa  
6 that have improved healthcare coverage <sup>38</sup>.

7  
8  
9  
10  
11 Ensuring access to all recommended vaccines for all children, regardless of sociodemographic or  
12 socioeconomic status, saves more lives and facilitates progress towards achieving sustainable  
13 development goals (SDGs) <sup>39</sup>. SDG target for child mortality aims to reduce neonatal mortality to  
14 lower than 12 deaths per 1,000 live births and under-5 mortality to lower than 25 deaths per  
15 1,000 live births across all countries <sup>39</sup>. In 2016, the infant mortality rate was 48 deaths per 1,000  
16 live births, and the under-5 mortality rate was 67 deaths per 1,000 live births in Ethiopia <sup>23</sup>.

17  
18  
19 Findings of the current study revealed that the use of maternal health services, maternal  
20 education, exposure to media, and wealth had positive contributions to basic vaccination uptake.  
21 These findings align with other similar studies <sup>11,15,40</sup>. Maternal knowledge about vaccinations is  
22 a determinant for vaccination status, which may be associated with increased knowledge about  
23 benefits of child vaccination because of counselling during family planning, and antenatal care  
24 contacts <sup>41-43</sup>. Moreover, based on findings related to the impact of residence and access to  
25 health facilities on vaccination, it may be that a mother with regular access to family planning  
26 and antenatal care is also more likely to seek out postnatal care where vaccination of her child  
27 can be more readily provided <sup>44</sup>.

28  
29  
30  
31  
32  
33  
34  
35  
36  
37  
38  
39  
40  
41 In the present study, maternal education had contributions to vaccine uptake in 2016, but this  
42 was not the case in 2011. Education helps to create improved awareness and knowledge about  
43 childhood vaccination <sup>42</sup>. Previous studies have also indicated that educated women are more  
44 likely to take their child for vaccination <sup>13,42</sup>. Exposure to media can also be a useful tool to reach  
45 population at different socioeconomic levels. The findings of this study showed that access to  
46 mass media (radio and TV) favourably influences vaccine uptake. Transmitting information about  
47 the importance of childhood vaccination is vital to reach not only mothers but also their partners  
48 and community leaders <sup>45</sup>. Information dissemination that targets mother's partner and  
49  
50  
51  
52  
53  
54  
55  
56  
57

1  
2  
3 community leaders can help to create a conducive environment that can favourably influence  
4 mothers to vaccinate their children.  
5  
6

7  
8 In the present study, the socioeconomic well-being of mothers was associated with higher  
9 vaccination uptake. While vaccinations are provided free of charge in many developing countries,  
10 mothers sometimes incur indirect costs, for example, transportation costs, which often limit their  
11 uptake of these services <sup>6</sup>. Mothers at the lower wealth categories are more likely to experience  
12 challenges in accessing healthcare facilities as such less likely to take their child for vaccination  
13  
14  
15  
16  
17 <sup>11</sup>.

18  
19 Children from rural areas had lower vaccination coverage compared to children from urban  
20 areas. In 2011, basic vaccination coverage was 48.2% in urban areas while it was 20.6% in rural  
21 areas. This pattern continued in 2016, as 64.6% of children from urban areas had basic  
22 vaccination, but only 35.2% in rural areas. This finding is consistent with those of similar studies  
23 <sup>11,46</sup>. This could partly be explained by challenges faced in rural areas due to less developed health  
24 infrastructure and fewer skilled providers <sup>47</sup>. In rural areas, long-distance to health facilities is  
25 another reason for low basic vaccination coverage. People live far away from health facilities and  
26 the long-distance, and lack of transportation poses a critical challenge for mothers to take their  
27 child for vaccination <sup>47</sup>. Vaccines require cold chain management as it is sensitive to high  
28 temperatures <sup>48</sup>. Health facilities in rural areas face a shortage of electric power supply to keep  
29 the cold chain equipment working, which could lead to cancellation of services as lack of cold  
30 chain equipment may result in the stock-out of vaccines <sup>15</sup>. One study from Nigeria found that  
31 47% of solar fridges for vaccine storage in eight states were broken <sup>49</sup>.  
32  
33  
34  
35  
36  
37  
38  
39  
40  
41  
42  
43

44 The strengths of this study include the use of a nationally representative survey from the two  
45 most recent DHS surveys. The decomposition of the contributing factors that drive  
46 socioeconomic inequalities in vaccination status provided a rich set of analysis for policy  
47 interventions to address socioeconomic disparities in access to basic vaccinations in Ethiopia.  
48 Limitations of the current study may include recall bias related to vaccination status as not all  
49 children had vaccination cards, and measures had to depend on the mother's verbal report. The  
50  
51  
52  
53  
54  
55  
56  
57

1  
2  
3 DHS is a cross-sectional survey; it was not possible to establish temporality between childhood  
4 vaccination and explanatory factors..  
5  
6  
7  
8  
9

## 10 Conclusions

11 The coverage of basic vaccination improved by 14 % from 2011 to 2016, but the overall coverage  
12 remained low. Increased vaccine coverage was disproportionately concentrated among children  
13 from wealthy households, while the majority of children who had no vaccination were from  
14 disadvantaged households. Utilisation of reproductive and maternal health services, household  
15 income status, and maternal education had significant positive contributions to improved  
16 vaccination status. Therefore, continued efforts at improving coverage of family planning,  
17 antenatal care contacts, institutional delivery, maternal education, and socioeconomic well-  
18 being are required to improve vaccination status. Moreover, regions such as Afar, Somali, and  
19 Oromia, and rural areas of the country at large require targeting.  
20  
21  
22  
23  
24  
25  
26  
27  
28  
29  
30  
31  
32  
33  
34  
35  
36  
37  
38  
39  
40  
41  
42  
43  
44  
45  
46  
47  
48  
49  
50  
51  
52  
53  
54  
55  
56  
57

### Acknowledgements:

Authors are grateful to ICF International for implementing the MEASURE DHS and making the data available for public use. United States Agency for International Development (USAID) funded the MEASURE DHS project.

### Funding:

There was no particular funding received for this study.

### Competing interests:

None declared

### Patient consent for publication:

Not required

### Ethics approval:

Ethics approval was not required for the current analysis, as the data were from publicly available DHS data. The MEASURE DHS /ICF International, Rockville, Maryland, USA – granted access to data upon request.

### Contributors

FTB designed the study, worked on the analysis and drafted the manuscript. AH helped revise the study design, and supervised the data analysis. All authors read and approved the final manuscript.

### Data availability statement:

The dataset was made available for public use after de-identification (data are available online at: <https://www.idhsdata.org/idhs/>)

## References

1. World Health Organization. Immunization coverage 2019. <https://www.who.int/news-room/fact-sheets/detail/immunization-coverage> [accessed January 19, 2019].
2. Arsenault C, Harper S, Nandi A, Mendoza Rodriguez JM, Hansen PM, Johri M. Monitoring equity in vaccination coverage: A systematic analysis of demographic and health surveys from 45 Gavi-supported countries. *Vaccine*. 2017;35(6):951-9.
3. Arsenault C, Harper S, Nandi A, Rodriguez JM, Hansen PM, Johri M. An equity dashboard to monitor vaccination coverage. *Bull World Health Organ*. 2017;95(2):128-34.
4. Federal Ministry of Health. A ETHIOPIA NATIONAL EXPANDED PROGRAMME ON IMMUNIZATION. April, 2015.
5. Porth JM, Wagner AL, Teklie H, Abeje Y, Moges B, Boulton ML. Vaccine non-receipt and refusal in Ethiopia: The expanded program on immunization coverage survey, 2012. *Vaccine*. 2019;37(15):2106-21.
6. Organization WH. State of Inequality: Reproductive Maternal Newborn and Child Health: Interactive Visualization of Health Data: World Health Organization; 2015.
7. Victora CG, Requejo JH, Barros AJ, Berman P, Bhutta Z, Boerma T, et al. Countdown to 2015: a decade of tracking progress for maternal, newborn, and child survival. 2016;387(10032):2049-59.
8. Arsenault C, Johri M, Nandi A, Mendoza Rodriguez JM, Hansen PM, Harper S. Country-level predictors of vaccination coverage and inequalities in Gavi-supported countries. *Vaccine*. 2017;35(18):2479-88.
9. Hosseinpoor AR, Bergen N, Schlottheuber A, Gacic-Dobo M, Hansen PM, Senouci K, et al. State of inequality in diphtheria-tetanus-pertussis immunisation coverage in low-income and middle-income countries: a multicountry study of household health surveys. *The Lancet Global Health*. 2016;4(9):e617-e26.
10. Shrivastwa N, Gillespie BW, Kolenic GE, Lepkowski JM, Boulton ML. Predictors of vaccination in India for children aged 12–36 months. *American journal of preventive medicine*. 2015;49(6):S435-S44.
11. Ataguba JE, Ojo KO, Ichoku HE. Explaining socio-economic inequalities in immunization coverage in Nigeria. *Health Policy Plan*. 2016;31(9):1212-24.
12. Branco FLCC, Pereira TM, Delfino BM, Braña AM, Oliart-Guzmán H, Mantovani SAS, et al. Socioeconomic inequalities are still a barrier to full child vaccine coverage in the Brazilian Amazon: a cross-sectional study in Assis Brasil, Acre, Brazil. *International journal for equity in health*. 2014;13(1):118.
13. Acharya K, Paudel YR, Dharel D. The trend of full vaccination coverage in infants and inequalities by wealth quintile and maternal education: analysis from four recent demographic and health surveys in Nepal. *BMC Public Health*. 2019;19(1).
14. Hajizadeh M. Decomposing socioeconomic inequality in child vaccination in the Gambia, the Kyrgyz Republic and Namibia. *Vaccine*. 2019;37(44):6609-16.
15. McGavin ZA, Wagner AL, Carlson BF, Power LE, Eboreime E, Boulton ML. Childhood full and under-vaccination in Nigeria, 2013. *Vaccine*. 2018;36(48):7294-9.
16. Sachs JD. From millennium development goals to sustainable development goals. *The Lancet*. 2012;379(9832):2206-11.
17. Tangcharoensathien V, Mills A, Palu T. Accelerating health equity: the key role of universal health coverage in the Sustainable Development Goals. *BMC medicine*. 2015;13(1):101.
18. Ethiopian Public Health Institute (EPHI) [Ethiopia] and ICF. Ethiopia Mini Demographic and Health Survey 2019: Key Indicators. Rockville, Maryland, USA: EPHI and ICF.; 2019.
19. World Health Organization. Regional Strategic Plan for Immunization 2014-2020: World Health Organization. Regional Office for Africa; 2015.

20. Mekonnen AG, Bayleyegn AD, Ayele ET. Immunization coverage of 12-23 months old children and its associated factors in Minjar-Shenkora district, Ethiopia: a community-based study. *BMC Pediatr.* 2019;19(1):198.
21. Tamirat KS, Sisay MM. Full immunization coverage and its associated factors among children aged 12-23 months in Ethiopia: further analysis from the 2016 Ethiopia demographic and health survey. *BMC Public Health.* 2019;19(1):1019.
22. Wondimu A, Cao Q, Wilschut JC, Postma MJ. Factors associated with the uptake of newly introduced childhood vaccinations in Ethiopia: the cases of rotavirus and pneumococcal conjugate vaccines. *BMC Public Health.* 2019;19(1):1656.
23. Central Statistical Agency (CSA) [Ethiopia], ICF. Ethiopia Demographic and Health Survey 2016.: Addis Ababa, Ethiopia, and Rockville, Maryland, USA: CSA and ICF; 2016.
24. The DHS Program. The DHS Overview. <https://dhsprogram.com/What-We-Do/Survey-Types/DHS.cfm>
25. The DHS Program. DHS Methodology. <https://dhsprogram.com/What-We-Do/Survey-Types/DHS-Methodology.cfm>.
26. The DHS Program. DHS Questionnaires. <https://dhsprogram.com/What-We-Do/Survey-Types/DHS-Questionnaires.cfm>.
27. Rutstein SO, Rojas G. Guide to DHS statistics. Calverton, MD: ORC Macro. 2006;38.
28. Restrepo-Mendez MC, Barros AJ, Wong KL, Johnson HL, Pariyo G, Franca GV, et al. Inequalities in full immunization coverage: trends in low- and middle-income countries. *Bull World Health Organ.* 2016;94(11):794-805B.
29. Solar O, Irwin A. A conceptual framework for action on the social determinants of health. 2010.
30. Ashish K, Nelin V, Raaijmakers H, Kim HJ, Singh C, Målqvist MJBotWHO. Increased immunization coverage addresses the equity gap in Nepal. 2017;95(4):261.
31. Doherty E, Walsh B, O'Neill C. Decomposing socioeconomic inequality in child vaccination: results from Ireland. *Vaccine.* 2014;32(27):3438-44.
32. O'Donnell O, Van Doorslaer E, Wagstaff A, Lindelow M. Analyzing health equity using household survey data: a guide to techniques and their implementation: The World Bank; 2007.
33. Wagstaff A, Doorslaer vE, Watanabe N. On decomposing the causes of health sector inequalities with an application to malnutrition inequalities in Vietnam: The World Bank; 2001.
34. Legesse E, Dechasa W. An assessment of child immunization coverage and its determinants in Sinana District, Southeast Ethiopia. *BMC pediatrics.* 2015;15(1):31.
35. Tadesse H, Deribew A, Woldie M. Explorative assessment of factors affecting child immunization in Wonago district, Gedeo zone, South Ethiopia. *Archives of Medical Science.* 2009;5(2):233.
36. Sadaf A, Richards JL, Glanz J, Salmon DA, Omer SB. A systematic review of interventions for reducing parental vaccine refusal and vaccine hesitancy. *Vaccine.* 2013;31(40):4293-304.
37. Hajizadeh M. Socioeconomic inequalities in child vaccination in low/middle-income countries: what accounts for the differences? *J Epidemiol Community Health.* 2018;72(8):719-25.
38. Federal Democratic Republic of Ethiopia [Ministry of Health]. Health Sector Transformation Plan (HSTP) 2015/16-2019/20 (2008-2012 EFY). Federal Democratic Republic of Ethiopia Ministry of Health; 2015.
39. UN. Transforming our world: the 2030 Agenda for Sustainable Development. Resolution A/RES/70/1. Adopted September, 2015. Geneva: United Nations, 2015. 2015.
40. Mbengue MAS, Sarr M, Faye A, Badiane O, Camara FBN, Mboup S, et al. Determinants of complete immunization among senegalese children aged 12-23 months: evidence from the demographic and health survey. *BMC Public Health.* 2017;17(1):630.

- 1  
2  
3 41. Bhutta ZA, Das JK, Bahl R, Lawn JE, Salam RA, Paul VK, et al. Can available interventions end  
4 preventable deaths in mothers, newborn babies, and stillbirths, and at what cost? *The Lancet*.  
5 2014;384(9940):347-70.  
6 42. Burroway R, Hargrove A. Education is the antidote: Individual- and community-level effects of  
7 maternal education on child immunizations in Nigeria. *Soc Sci Med*. 2018;213:63-71.  
8 43. Bobo FT, Yesuf EA, Woldie M. Inequities in utilization of reproductive and maternal health  
9 services in Ethiopia. *Int J Equity Health*. 2017;16(1):105.  
10 44. Kerber KJ, de Graft-Johnson JE, Bhutta ZA, Okong P, Starrs A, Lawn JE. Continuum of care for  
11 maternal, newborn, and child health: from slogan to service delivery. *Lancet*. 2007;370(9595):1358-69.  
12 45. Zamawe CO, Banda M, Dube ANJBp, childbirth. The impact of a community driven mass media  
13 campaign on the utilisation of maternal health care services in rural Malawi. 2016;16(1):21.  
14 46. Raza O, Lodhi FS, Morasae EK, Majdzadeh R. Differential achievements in childhood  
15 immunization across geographical regions of Pakistan: analysis of wealth-related inequality. *Int J Equity*  
16 *Health*. 2018;17(1):122.  
17 47. Organization WH. State of inequality: childhood immunization. 2016.  
18 48. Kartoglu U, Milstien J. Tools and approaches to ensure quality of vaccines throughout the cold  
19 chain. *Expert Rev Vaccines*. 2014;13(7):843-54.  
20 49. Ophori EA, Tula MY, Azih AV, Okojie R, Ikpo PE. Current trends of immunization in Nigeria:  
21 prospect and challenges. *Trop Med Health*. 2014;42(2):67-75.  
22  
23  
24  
25  
26  
27

## 28 Figures

29  
30  
31 Fig. 1 Vaccination coverage among children aged 12-23 months in Ethiopia (DHS 2011, 2016).

32  
33 Fig. 2 Concentration curves for child vaccination status, Ethiopia (DHS 2011, 2016)

34  
35 Fig. 3 Concentration indices that shows socioeconomic inequalities in child vaccinations, Ethiopia (DHS  
36 2011, 2016)

37  
38 2Fig. 4 Percentage contributions of factors explaining socioeconomic inequalities in full vaccination  
39 coverage, Ethiopia (DHS 2011, 2016)  
40  
41  
42  
43  
44  
45  
46  
47  
48  
49  
50  
51  
52  
53  
54  
55  
56  
57

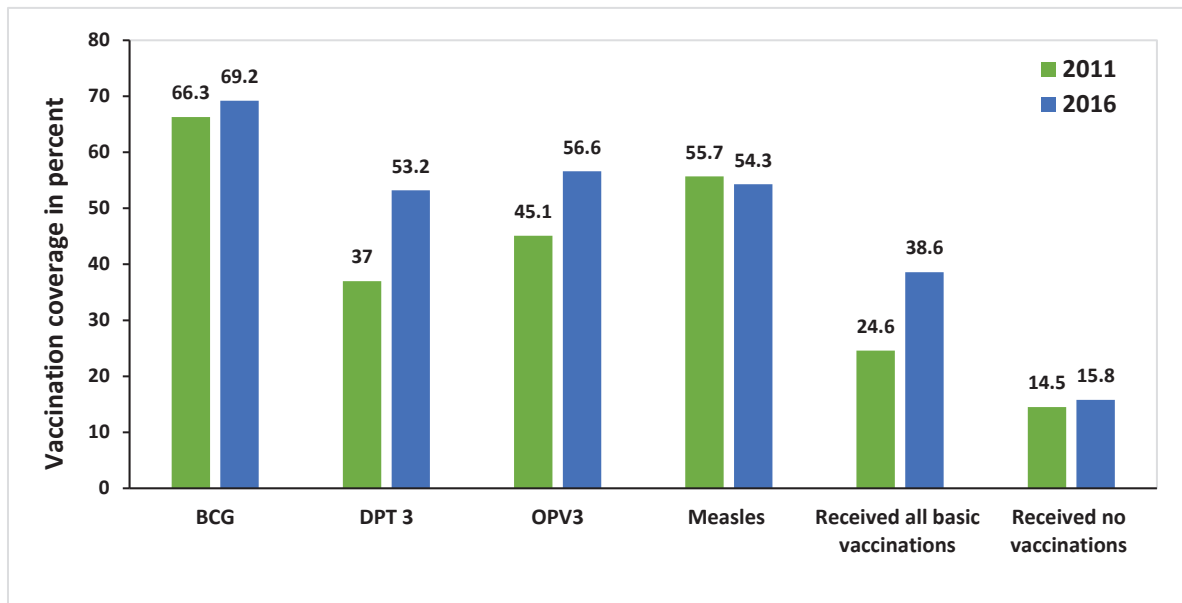

Fig. 1 Vaccination coverage among children aged 12-23 months in Ethiopia (DHS 2011, 2016).



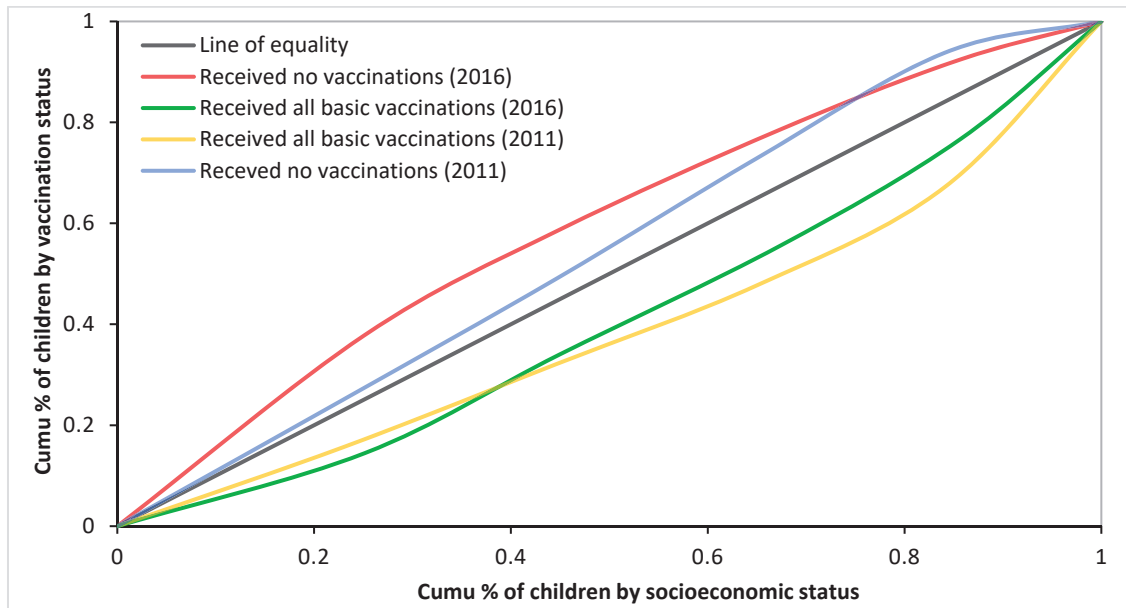

Fig. 2 Concentration curves for child vaccination status, Ethiopia (DHS 2011, 2016)

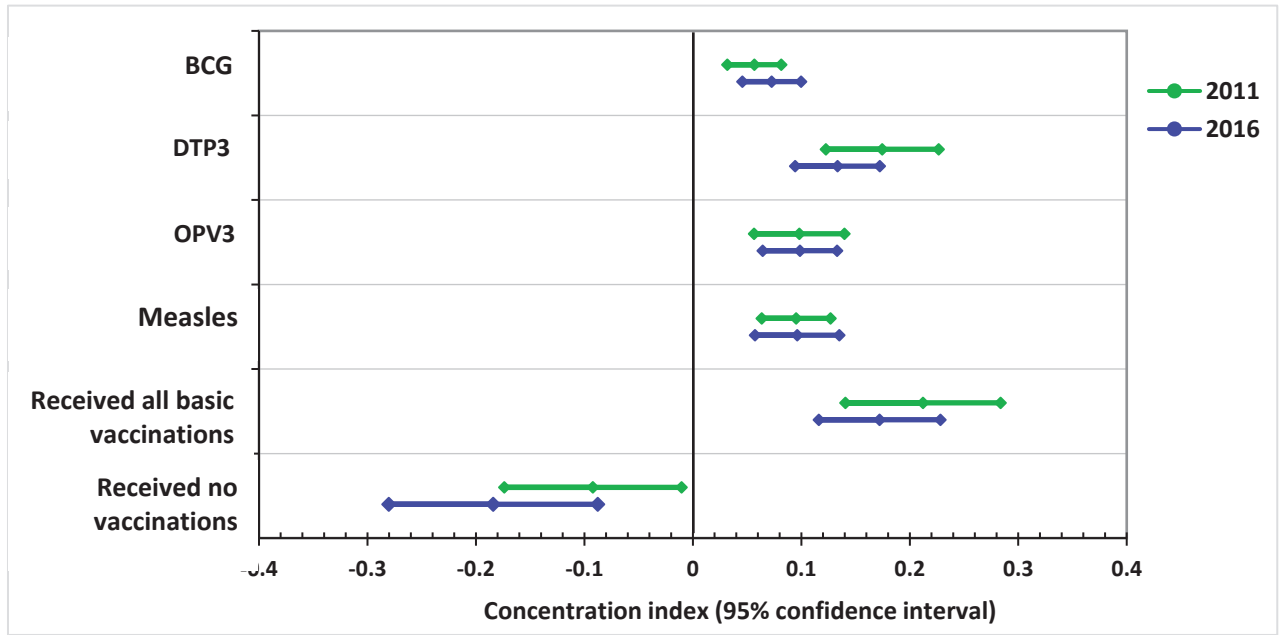

Fig. 3 Concentration indices that shows socioeconomic inequalities in child vaccinations, Ethiopia (DHS 2011, 2016)

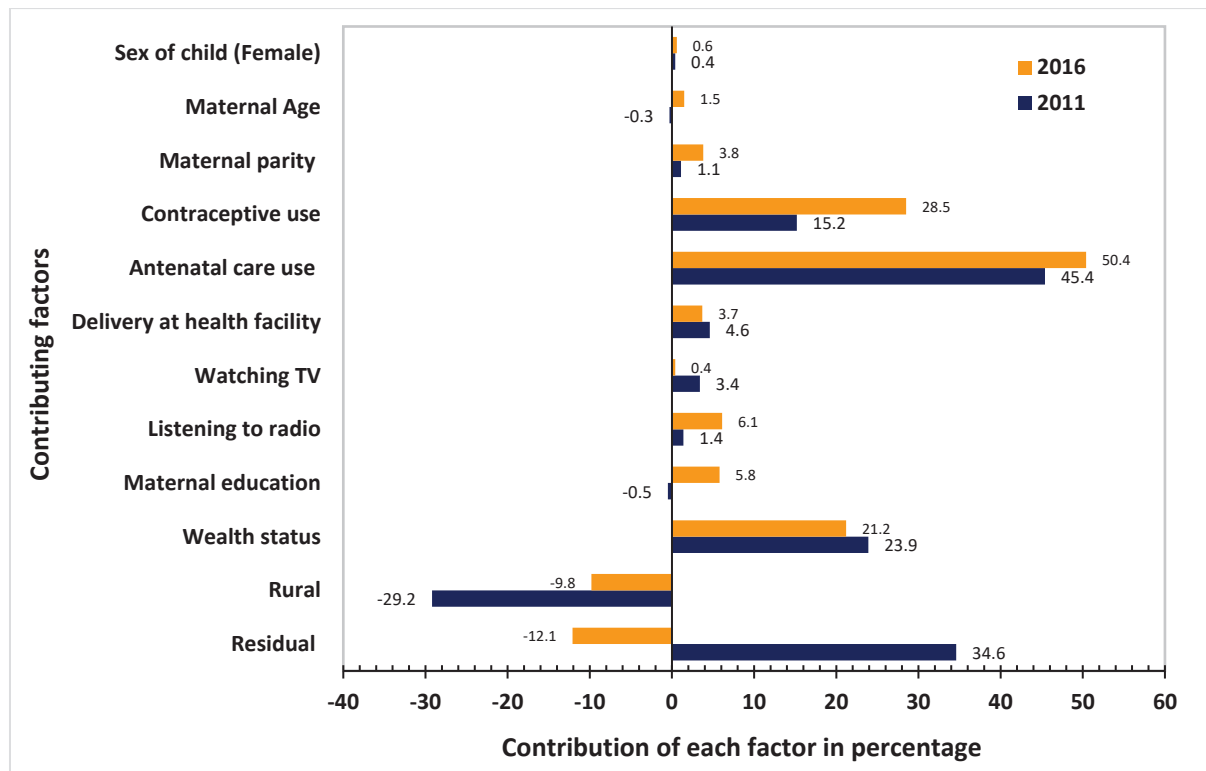

Fig. 4 Percentage contributions of factors explaining socioeconomic inequalities in full vaccination coverage, Ethiopia (DHS 2011, 2016)

1  
2  
3 **Health Insurance Coverage and Associated Factors among Women in Ethiopia: A Secondary Analysis of Ethiopia**  
4 **Demographic and Health Survey Data 2016 – STROBE checklist**  
5

|                             | Page No | Recommendation                                                                                                                                                                                                                                                                                                                             |
|-----------------------------|---------|--------------------------------------------------------------------------------------------------------------------------------------------------------------------------------------------------------------------------------------------------------------------------------------------------------------------------------------------|
| <b>Title and abstract</b>   | 1 – 3   | (a) Indicate the study's design with a commonly used term in the title or the abstract<br>(b) Provide in the abstract an informative and balanced summary of what was done and what was found                                                                                                                                              |
| <b>Introduction</b>         |         |                                                                                                                                                                                                                                                                                                                                            |
| Background/rationale        | 4       | Explain the scientific background and rationale for the investigation being reported                                                                                                                                                                                                                                                       |
| Objectives                  | 4       | State specific objectives, including any prespecified hypotheses                                                                                                                                                                                                                                                                           |
| <b>Methods</b>              |         |                                                                                                                                                                                                                                                                                                                                            |
| Study design                | 5       | Present key elements of study design early in the paper                                                                                                                                                                                                                                                                                    |
| Setting                     | 5       | Describe the setting, locations, and relevant dates, including periods of recruitment, exposure, follow-up, and data collection                                                                                                                                                                                                            |
| Participants                | 5       | (a) Give the eligibility criteria, and the sources and methods of selection of Participants                                                                                                                                                                                                                                                |
| Variables                   | 5-6     | Clearly define all outcomes, exposures, predictors, potential confounders, and effect Modifiers. Give diagnostic criteria, if applicable                                                                                                                                                                                                   |
| Data sources/<br>measuremen | 5       | For each variable of interest, give sources of data and details of methods of assessment (measurement). Describe comparability of assessment methods if there is                                                                                                                                                                           |
| Bias                        | 7       | Describe any efforts to address potential sources of bias                                                                                                                                                                                                                                                                                  |
| Study size                  | 5       | Explain how the study size was arrived at                                                                                                                                                                                                                                                                                                  |
| Quantitative variables      | 5-6     | Explain how quantitative variables were handled in the analyses. If applicable, describe which groupings were chosen and why                                                                                                                                                                                                               |
| Statistical methods         | 6-7     | (a) Describe all statistical methods, including those used to control for confounding<br>(b) Describe any methods used to examine subgroups and interactions<br>(c) Explain how missing data were addressed<br>(d) If applicable, describe analytical methods taking account of sampling strategy<br>(e) Describe any sensitivity analyses |
| <b>Results</b>              |         |                                                                                                                                                                                                                                                                                                                                            |
| Participants                | 8       | (a) Report numbers of individuals at each stage of study—eg numbers potentially eligible, examined for eligibility, confirmed eligible, included in the study, completing follow-up, and analysed<br>(b) Give reasons for non-participation at each stage<br>(c) Consider use of a flow diagram                                            |
| Descriptive data            | 8-10    | (a) Give characteristics of study participants (eg demographic, clinical, social) and information on exposures and potential confounders<br>(b) Indicate number of participants with missing data for each variable of interest                                                                                                            |
| Outcome data                | 11-12   | Report numbers of outcome events or summary measures                                                                                                                                                                                                                                                                                       |
| Main results                | 10-14   | (a) Give unadjusted estimates and, if applicable, confounder-adjusted estimates and their precision (eg, 95% confidence interval). Make clear which confounders were<br>(b) Report category boundaries when continuous variables were categorized                                                                                          |

1  
2  
3  
4  
5  
6  
7  
8  
9  
10  
11  
12  
13  
14  
15  
16  
17  
18  
19  
20  
21  
22  
23  
24  
25  
26  
27  
28  
29  
30  
31  
32  
33  
34  
35  
36  
37  
38  
39  
40  
41  
42  
43  
44  
45  
46  
47  
48  
49  
50  
51  
52  
53  
54  
55  
56  
57  
58  
59  
60

|                          |       |                                                                                                                                                                            |
|--------------------------|-------|----------------------------------------------------------------------------------------------------------------------------------------------------------------------------|
|                          |       | (c) If relevant, consider translating estimates of relative risk into absolute risk for a meaningful time period                                                           |
| Other analyses           | N/A   | Report other analyses done—eg analyses of subgroups and interactions, and sensitivity analyses                                                                             |
| Discussion               |       |                                                                                                                                                                            |
| Key results              | 13-17 | Summarise key results with reference to study objectives                                                                                                                   |
| Limitations              | 3     | Discuss limitations of the study, taking into account sources of potential bias or                                                                                         |
| Interpretation           | 13-17 | Give a cautious overall interpretation of results considering objectives, limitations, multiplicity of analyses, results from similar studies, and other relevant evidence |
| Generalisability         | 3     | Discuss the generalisability (external validity) of the study results                                                                                                      |
| <b>Other information</b> | N/A   | Give the source of funding and the role of the funders for the present study and, if applicable, for the original study on which the present article is based              |
| Funding                  |       |                                                                                                                                                                            |

# BMJ Open

## Decomposition of socioeconomic inequalities in child vaccination in Ethiopia: Results from the 2011-2016 demographic and health survey data

|                                 |                                                                                                                                                                                                                                    |
|---------------------------------|------------------------------------------------------------------------------------------------------------------------------------------------------------------------------------------------------------------------------------|
| Journal:                        | <i>BMJ Open</i>                                                                                                                                                                                                                    |
| Manuscript ID                   | bmjopen-2020-039617.R2                                                                                                                                                                                                             |
| Article Type:                   | Original research                                                                                                                                                                                                                  |
| Date Submitted by the Author:   | 19-Aug-2020                                                                                                                                                                                                                        |
| Complete List of Authors:       | Bobo, Firew Tekle; Department of Public Health, Institute of Health Sciences, Wollega University<br>Hayen, Andrew; School of Public Health, Faculty of Health, University of Technology Sydney, Sydney, New South Wales, Australia |
| <b>Primary Subject Heading</b>: | Health economics                                                                                                                                                                                                                   |
| Secondary Subject Heading:      | Health economics, Health services research                                                                                                                                                                                         |
| Keywords:                       | Paediatric infectious disease & immunisation < PAEDIATRICS, Health economics < HEALTH SERVICES ADMINISTRATION & MANAGEMENT, Public health < INFECTIOUS DISEASES, Community child health < PAEDIATRICS                              |
|                                 |                                                                                                                                                                                                                                    |

SCHOLARONE™  
Manuscripts



I, the Submitting Author has the right to grant and does grant on behalf of all authors of the Work (as defined in the below author licence), an exclusive licence and/or a non-exclusive licence for contributions from authors who are: i) UK Crown employees; ii) where BMJ has agreed a CC-BY licence shall apply, and/or iii) in accordance with the terms applicable for US Federal Government officers or employees acting as part of their official duties; on a worldwide, perpetual, irrevocable, royalty-free basis to BMJ Publishing Group Ltd ("BMJ") its licensees and where the relevant Journal is co-owned by BMJ to the co-owners of the Journal, to publish the Work in this journal and any other BMJ products and to exploit all rights, as set out in our [licence](#).

The Submitting Author accepts and understands that any supply made under these terms is made by BMJ to the Submitting Author unless you are acting as an employee on behalf of your employer or a postgraduate student of an affiliated institution which is paying any applicable article publishing charge ("APC") for Open Access articles. Where the Submitting Author wishes to make the Work available on an Open Access basis (and intends to pay the relevant APC), the terms of reuse of such Open Access shall be governed by a Creative Commons licence – details of these licences and which [Creative Commons](#) licence will apply to this Work are set out in our licence referred to above.

Other than as permitted in any relevant BMJ Author's Self Archiving Policies, I confirm this Work has not been accepted for publication elsewhere, is not being considered for publication elsewhere and does not duplicate material already published. I confirm all authors consent to publication of this Work and authorise the granting of this licence.

# Decomposition of socioeconomic inequalities in child vaccination in Ethiopia: Results from the 2011-2016 demographic and health survey data

Firew Tekle Bobo <sup>1,2\*</sup> Andrew Hayen<sup>2</sup>

<sup>1</sup>Department of Public Health, Institute of Health, Wollega University; Nekemte, Oromia, Ethiopia

<sup>2</sup>School of Public Health, Faculty of Health, University of Technology Sydney, Sydney, New South Wales, Australia

\*corresponding

Email

[free11messi@gmail.com](mailto:free11messi@gmail.com)



## Abstract

**Objectives:** Monitoring and addressing unnecessary and avoidable differences in child vaccination is a critical global concern. This study aimed to assess socioeconomic inequalities in basic vaccination coverage among children aged 12-23 months in Ethiopia.

**Design, setting and participants:** Secondary analyses of cross-sectional data from the two most recent (2011 and 2016) Ethiopia Demographic and Health Surveys were performed. This analysis included 1930 mother-child pairs in 2011 and 2004 mother-child pairs in 2016.

**Outcome measures:** Completion of basic vaccinations was defined based on whether a child received a single dose of Bacille Calmette Guerin (BCG), three doses of diphtheria, tetanus toxoids, and pertussis (DTP), three doses of polio vaccine (OPV), and one dose of measles vaccine.

**Methods:** The concentration curve and concentration index (CCI) were used to estimate wealth related to inequalities. The concentration indices were also decomposed to examine the contributing factors to socioeconomic inequalities in childhood vaccination.

**Results:** From 2011 to 2016, the proportion of children who received basic vaccination increased from 24.6% (95% confidence interval, CI: 21.4 to 28.0) to 38.6% (95% CI: 34.6 to 42.9). While coverage of BCG, DPT, and polio immunization increased during the study period, the uptake of measles vaccine decreased. The positive concentration index shows that basic vaccination status was favourably concentrated among children from wealthier households CCI= 0.212 in 2011 and CCI= 0.212 in 2016. The decomposition analysis shows that use of maternal health services such as family planning and antenatal care, socioeconomic status, exposure to media, urban-rural residence, and maternal education explain inequalities in basic vaccination coverage in Ethiopia.

**Conclusions:** Childhood vaccination coverage was low in Ethiopia. Vaccination was less likely in poorer than in richer households. Addressing wealth inequalities, enhancing education, and improving maternal health service coverage will reduce socioeconomic inequalities in basic vaccination uptake in Ethiopia.

**Keywords:** Inequality, Immunization, Vaccination, Socioeconomic factors, Ethiopia

## Strengths and limitations

- This study used two most recent (2011 and 2016) nationally representative Demographic and Health Surveys (DHS).
- The decomposition of the contributing factors that drive socioeconomic inequalities in vaccination status provided a rich set of analysis for policy interventions to address socioeconomic disparities in child vaccination in Ethiopia.
- Limitations of the current study may include recall bias related to vaccination status as not all children had vaccination cards, and measures had to depend on the mother's verbal report.
- The DHS is a cross-sectional survey; it was not possible to establish temporality between childhood vaccination and explanatory factors, precluding causal inference.

## Introduction

Vaccination is an important public health intervention that helps prevent 2 to 3 million child deaths each year.<sup>1</sup> With improved coverage, vaccines have the potential to save many more children, which is why it is necessary to ensure that all children receive all recommended vaccines.<sup>2,3</sup>

In Ethiopia, a child is said to have received full vaccinations if they receive one dose of the Bacille Calmette-Guérin vaccine (BCG, for tuberculosis), three doses of the pentavalent vaccine (penta includes diphtheria, tetanus, pertussis [DTP], hepatitis B [HBV], and Haemophilus influenzae type b [Hib]), three doses of the oral polio vaccine (OPV), three doses of the pneumococcal conjugate vaccine (PCV), and two doses of the rotavirus vaccine (rota), and one dose of measles-containing vaccine (MCV).<sup>4,5</sup> Basic vaccination is defined as access to a single dose of BCG, three doses of DTP, three doses of OPV, and one dose of measles vaccine by the age of 12 months.<sup>4</sup>

In the past decades, global basic vaccination coverage has improved remarkably.<sup>6,7</sup> In 2018, the proportion of the world's children who received three doses of the combined diphtheria, tetanus toxoid, and pertussis-containing vaccine (DTP3) reached 86% worldwide.<sup>1</sup> However, there are inequalities in access to childhood vaccination and many children do not receive the basic vaccines worldwide.<sup>8,9</sup>

Many regions of the world continue to have low coverage. The World Health Organization (WHO) report in 2019 shows that 19.4 million children under the age of one year did not receive basic vaccines; around 60% of these children live in 10 nations, including Nigeria, the Democratic Republic of the Congo and Ethiopia.<sup>1</sup> Disparities in vaccination coverage exist within and between countries, and in some places; the difference is more significant.<sup>8</sup> Within countries, inequalities in child vaccination data show that richer subgroups tend to have higher coverage whereas the coverage among poorer subgroups varies across countries. For example, studies in India<sup>10</sup>, Nigeria<sup>11</sup> and Brazil<sup>12</sup> indicated that children of mothers who had higher education levels and household wealth status are more likely receive higher vaccination coverage.

Complete lack or incomplete childhood vaccination remains the cause of millions of preventable child deaths each year in many countries.<sup>1</sup> Previous studies in the area suggest that there exists a social gradient in child vaccination within countries.<sup>13-15</sup> For example, increased vaccination

1  
2  
3 coverage was favorably concentrated among children whose parents are well-educated, wealthy  
4 or living in urban areas. Inequalities in access to child vaccination need to be effectively assessed,  
5 monitored, and intervened to address systematically missed population groups.<sup>16,17</sup> In 2019, only  
6 43% of children received all recommended vaccines while 19% received none of the vaccines<sup>18</sup>.  
7 This is way below WHO's 2020 goal of 90% coverage in every country<sup>19</sup>. Addressing these gaps  
8 requires measuring inequalities in basic vaccination coverage and identifying where gaps exist in  
9 routinely delivered vaccines and provide valuable information to introduce effective strategies  
10 and policies to address such inequalities. It is equally important those children who receive  
11 incomplete or no vaccines be identified to devise equity-oriented immunisation programs to  
12 reach disadvantaged populations and reduce Ethiopia's high levels of vaccine preventable  
13 childhood morbidity and mortality.

14  
15  
16 Although there are previous studies<sup>20-22</sup> in Ethiopia that have addressed factors associated with  
17 childhood vaccination, there is a need to examine trends and socioeconomic inequalities in  
18 childhood vaccination. The objective of this study is to examine trends and socioeconomic  
19 inequalities in childhood vaccination. Moreover, the paper assesses factors that explain  
20 socioeconomic inequalities in childhood vaccination in the country using a decomposition  
21 approach.  
22  
23  
24  
25  
26  
27  
28  
29  
30  
31  
32  
33  
34  
35  
36  
37  
38  
39  
40  
41  
42  
43  
44  
45  
46  
47  
48  
49  
50  
51  
52  
53  
54  
55  
56  
57

## Methods

### Data

We analysed the most recent (2011 and 2016) Ethiopia Demographic and Health Surveys. The Ethiopian Central Statistical Agency (CSA) undertook the surveys in collaboration with the DHS program.<sup>23</sup> The DHS are nationally representative household surveys with large sample sizes and high response rates.<sup>24</sup> The DHS uses a stratified, two-stage sampling technique to obtain the study participants.<sup>25</sup> Standardised questionnaires are used across time and countries to ensure collected data are comparable.<sup>26</sup> Sampling methods and design have been described elsewhere.<sup>27</sup> For the purpose of this study, data collected on vaccination status of children aged 12-23 months were extracted and analyzed. The Ethiopia DHS included information on 11,872 births/women in 2011 and 11,023 births/women in 2016. The sample used for the current analysis was limited to children aged 12–23 months at the time of the survey, yielding a final sample of 1930 mother-child pairs in 2011, and 2004 mother-child pairs in 2016.

### Measures

The dependent variable is whether a child received all basic vaccinations that is the eight recommended basic vaccines.<sup>28</sup> The vaccines included one dose of Bacille Calmette Guerin (BCG) against tuberculosis, three doses of diphtheria, tetanus toxoids, and pertussis vaccine (DTP), three doses of oral polio vaccine (OPV), and one dose of measles vaccine. Table 1 shows immunization schedule for children under 12 months in Ethiopia.<sup>4</sup> The DHS determined the vaccination status of children from two sources. Primarily immunization record cards provided by mothers, but if these were absent the DHS data collectors used mothers' verbal reports of children's immunization status.

Table 1 Basic vaccination schedule for children under 12 months in Ethiopia

| Vaccine | Diseases                       | Age                       |
|---------|--------------------------------|---------------------------|
| BCG     | Tuberculosis                   | At birth                  |
| DPT     | Diphtheria, Pertussis, Tetanus | 6, 10, 14 weeks           |
| OPV     | Polio                          | At birth, 6, 10, 14 weeks |
| Measles | Measles                        | 9 months                  |

The WHO Commission on Social Determinants of Health framework<sup>29</sup> was used to explain contributing factors of inequalities in vaccination status. In addition, factors identified in the

1  
2  
3 current literature <sup>11,13,14,30,31</sup> on child vaccination that are available in the DHS surveys were  
4 included. The independent variables considered in the current study include 1) maternal and  
5 household factors: maternal parity, age, education levels, wealth status, and the use of maternal  
6 health services, 2) exposure to media, and 3) place of residence – urban/rural status.  
7  
8  
9

10  
11 The wealth index is a composite variable that measures the woman's household living standards.  
12 It is constructed by collecting and analysing information on ownership of selected materials and  
13 assets, such as radio, television, refrigerator, and vehicle; materials used for housing  
14 construction; and types of sanitation facilities and water access. Households were ranked into  
15 five quintiles (poorest, poorer, middle, richer and richest) depending on their level of wealth.  
16  
17  
18  
19

20  
21 We grouped education levels of the mothers in to three categories (no education, primary, and  
22 secondary or higher). Exposure to media: frequency of listening to radio and watching television  
23 (TV): both categorised as (not at all, less than once a week, and once a week or more). Utilization  
24 of reproductive and maternal health services considered in the current study include use of  
25 contraceptive, antenatal care contacts, and delivery at the health facility.  
26  
27  
28  
29

### 30 31 Statistical analysis

32  
33 Socioeconomic inequalities in the coverage of vaccination status were estimated using the  
34 concentration curve and concentration index. <sup>32</sup> The concentration curve is a plot of the  
35 cumulative percentage of the population, ranked by wealth status, from the poorest to the  
36 richest (x-axis) against the cumulative percentage of the health variable (vaccination status) on  
37 the y-axis. If all children had an equal proportion of vaccination status regardless of their  
38 socioeconomic status, then the curve would coincide with the 45° line, which indicates the  
39 presence of equality in the coverage of vaccination. If the concentration curve falls below the 45°  
40 line of equality, it indicates that the uptake of vaccines is more concentrated among the rich. The  
41 opposite is true if the curve falls above the line of equality.  
42  
43  
44  
45  
46  
47  
48  
49

50  
51 The concentration index is described as two times the area between the line of equality and the  
52 concentration curve. The index takes a value between -1 and +1; an index of 0 indicates the  
53 presence of equality in the uptake of vaccines. If wealth related inequalities exist, it can be seen  
54  
55  
56  
57

in one of the two forms, the first is when there is uneven concentration of vaccine uptake among the rich, and in this case, the concentration index takes on a positive value. The second is negative value concentration index, which implies high concentration of vaccination status among the poor.

The concentration index (CCI) can be computed as follows:

$$CCI = \frac{2}{y} cov(h, r), \quad (1)$$

where  $h$  is the healthcare outcome of interest (i.e. vaccination status),  $y$  is the mean of  $h$  and  $r$  is the fractional rank of an individual in the wealth distribution. We also computed 95% CIs for the concentration index.

## Decomposing inequality

The concentration curve and concentration index can only show and quantify the level of inequalities related to wealth in the use of health services. However, policymakers are also interested in the factors that contribute to socioeconomic inequalities in vaccination coverage. This can be done using an approach developed by Wagstaff and colleagues.<sup>33</sup> The concentration index of a health variable can be decomposed into the contributions of individual factors to wealth-related health inequality. If we consider a linear regression model for the child's vaccination status,  $v$ , is defined according to  $k$  explanatory factors,  $x_k$  as.

$$v = \alpha + \sum_k \beta_k x_k + \varepsilon, \quad (2)$$

where  $\alpha$  and  $\beta$  are parameters, and  $\varepsilon$  is the error term. The concentration index for child vaccination status can be decomposed as:

$$C = \sum_k \left( \frac{\beta_k \bar{x}_k}{\mu} \right) C_k + \frac{GC_\varepsilon}{\mu}, \quad (3)$$

where  $\mu$  is the mean of  $y$ ,  $\bar{x}_k$  is the mean of  $x_k$ ,  $C_k$  is the concentration index for  $x_k$ , (defined analogously to  $C$ ), and  $GC_\varepsilon$  is the generalized concentration index for the error term ( $\varepsilon$ ). Equation 3 shows that  $C$  is equal to a weighted sum of the concentration indices of the  $k$  regressors, where

1  
2  
3 the weight for  $x_k$  is the elasticity of  $y$  with respect to  $x_k$  ( $\eta_k = \beta_k \frac{\bar{x}_k}{\mu}$ ). The residual component—  
4 captured by the last term ( $\frac{GC_\varepsilon}{\mu}$ ) reflects the wealth-related inequality in health that is not  
5 explained by systematic variation in the regressors. We used the bootstrap method with 1000  
6 replications to estimate standard errors. All analysis were performed after adjusting for sampling  
7 design (stratification and clustering) and sampling weights. STATA (version 14, StataCorp, College  
8 Station, Tex) and SPSS (version 26) software packages were used to perform data analysis.  
9  
10  
11  
12  
13  
14  
15

## 16 Patient and public involvement

17 Patients/public were not involved in the design or implementation of this study.  
18

## 19 Results

20 The sample used for the current analysis was limited to children aged 12–23 months at the time  
21 of the survey, yielding a final sample of 1930 mother-child pairs in 2011, and 2004 mother-child  
22 pairs in 2016. The majority (85.8% and 88.4%) of respondents were from rural areas in 2011 and  
23 2016 surveys respectively, and more than 42% were from Oromia, which is the biggest region in  
24 the country. The percentage of mothers who had no education decreased from 68% in 2011 to  
25 64% in 2016 while antenatal care contacts increased from 42% in 2011 to 60% in 2016 (Table 2).  
26  
27  
28  
29  
30  
31  
32  
33  
34  
35

## 36 Trends of vaccination coverage

37 Vaccination coverage showed improvements from 2011 to 2016; BCG vaccine uptake increased  
38 from 66% to 69%, DTP3 vaccine from 37% to 57%, OPV3 vaccine from 45% to 57%, and basic  
39 vaccination coverage from 24% in 2011 to 38% in 2016. The proportion of children who received  
40 all basic vaccinations that include BCG, DTP3, OPV3, and measles increased by 14% from 2011 to  
41 2016. However, measles vaccine coverage decreased from 56% in 2011 to 54% in 2016, while the  
42 proportion of children who received no vaccination increased from 14% in 2011 to 16% in 2016  
43 (Figure 1).  
44  
45  
46  
47  
48  
49  
50  
51

52 The urban/rural differential in basic vaccination coverage increased from almost 28% in 2011 to  
53 more than 29% in 2016 (Table 2). Coverage remained low but showed slight increases from 2011  
54  
55  
56  
57



1  
2  
3 to 2016 in regions such as Afar (8.5% to 15.2%), Somali (17.1% to 21.8%), and Oromia (15.6% to  
4 24.7%). Basic vaccination coverage also showed disparities between and within the regions of  
5 Ethiopia (Table 2). For example, in 2016, coverage was 89.2% (95% CI: 82.0%, 93.8%) and 67.3%  
6 (95% CI: 57.6%, 75.7%) among children living in Addis Ababa and Tigray regions respectively,  
7 whereas in Afar it was 15.2% (95% CI: 8.0%, 26.9%), and Somali 21.8% (95% CI: 13.8%, 32.7%).  
8  
9  
10  
11  
12  
13  
14  
15  
16  
17  
18  
19  
20  
21  
22  
23  
24  
25  
26  
27  
28  
29  
30  
31  
32  
33  
34  
35  
36  
37  
38  
39  
40  
41  
42  
43  
44  
45  
46  
47  
48  
49  
50  
51  
52  
53  
54  
55  
56  
57

For peer review only

Table 2 Basic vaccination coverage by maternal and child characteristics in Ethiopia (DHS 2011 – 2016)

| Study variables                  | 2011   |         |                                          |                  | 2016   |         |                                          |                  |
|----------------------------------|--------|---------|------------------------------------------|------------------|--------|---------|------------------------------------------|------------------|
|                                  | Number | Percent | Received all basic immunization (95% CI) | P-value          | Number | Percent | Received all basic immunization (95% CI) | P-value          |
| <b>Sex of child</b>              |        |         |                                          | <b>0.268</b>     |        |         |                                          | <b>0.252</b>     |
| Male                             | 1010   | 52.3    | 23.1 (19.3, 27.5)                        |                  | 926    | 46.2    | 36.5 (31.2, 42.1)                        |                  |
| Female                           | 920    | 47.7    | 26.1 (22.0, 30.7)                        |                  | 1078   | 53.8    | 40.5 (35.4, 45.8)                        |                  |
| <b>Parity</b>                    |        |         |                                          | <b>0.101</b>     |        |         |                                          | <b>0.002</b>     |
| 1                                | 358    | 18.6    | 30.1 (23.3, 37.9)                        |                  | 372    | 18.6    | 45.3 (37.7, 53.1)                        |                  |
| 2                                | 318    | 16.5    | 26.7 (20.7, 33.7)                        |                  | 322    | 16.0    | 47.1 (39.0, 55.3)                        |                  |
| 3                                | 306    | 15.9    | 22.8 (17.1, 29.8)                        |                  | 282    | 14.1    | 40.4 (31.9, 49.5)                        |                  |
| 4                                | 230    | 11.9    | 24.4 (18.1, 32.0)                        |                  | 243    | 12.1    | 39.5 (31.4, 48.2)                        |                  |
| 5                                | 220    | 11.4    | 15.3 (9.9, 22.8)                         |                  | 216    | 10.8    | 30.1 (21.5, 40.3)                        |                  |
| 6                                | 497    | 25.7    | 23.8 (17.5, 31.6)                        |                  | 569    | 28.4    | 28.7 (22.3, 36.2)                        |                  |
| <b>Maternal age</b>              |        |         |                                          | <b>0.992</b>     |        |         |                                          | <b>0.197</b>     |
| 15-24                            | 518    | 26.8    | 24.6 (19.6, 30.4)                        |                  | 499    | 24.9    | 37.9 (31.6, 44.7)                        |                  |
| 25-29                            | 649    | 33.6    | 23.8 (19.3, 29.1)                        |                  | 596    | 29.7    | 44.1 (37.1, 51.4)                        |                  |
| 30-34                            | 386    | 20.0    | 24.7 (19.0, 31.5)                        |                  | 456    | 22.7    | 35.1 (28.7, 42.1)                        |                  |
| 35-39                            | 251    | 13.0    | 26.0 (18.9, 34.5)                        |                  | 295    | 14.7    | 33.5 (25.7, 42.4)                        |                  |
| 40-49                            | 127    | 6.6     | 24.8 (16.0, 36.2)                        |                  | 158    | 7.9     | 39.9 (29.3, 51.5)                        |                  |
| <b>Contraceptive use</b>         |        |         |                                          | <b>&lt;0.001</b> |        |         |                                          | <b>&lt;0.001</b> |
| Never used                       | 1106   | 57.3    | 17.9 (14.5, 21.8)                        |                  | 932    | 46.5    | 25.8 (21.3, 30.8)                        |                  |
| Using or used before             | 824    | 42.7    | 33.5 (28.8, 38.5)                        |                  | 1072   | 53.5    | 49.8 (44.3, 55.4)                        |                  |
| <b>Antenatal care contact</b>    |        |         |                                          | <b>&lt;0.001</b> |        |         |                                          | <b>&lt;0.001</b> |
| No                               | 1040   | 53.9    | 14.8 (11.6, 18.6)                        |                  | 711    | 35.5    | 18.6 (13.8, 24.4)                        |                  |
| Yes                              | 815    | 42.2    | 37.3 (32.7, 42.1)                        |                  | 1194   | 59.6    | 50.8 (45.7, 55.8)                        |                  |
| <b>Place child was delivered</b> |        |         |                                          | <b>&lt;0.001</b> |        |         |                                          | <b>&lt;0.001</b> |
| Home                             | 1694   | 87.8    | 20.6 (17.5, 24.1)                        |                  | 1309   | 65.3    | 30.6 (25.9, 35.6)                        |                  |
| Health facility                  | 236    | 12.2    | 52.7 (43.3, 62.0)                        |                  | 695    | 34.7    | 53.8 (47.6, 60.0)                        |                  |

1  
2  
3  
4  
5  
6  
7  
8  
9  
10  
11  
12  
13  
14  
15  
16  
17  
18  
19  
20  
21  
22  
23  
24  
25  
26  
27  
28  
29  
30  
31  
32  
33  
34  
35  
36  
37  
38  
39  
40  
41  
42  
43  
44  
45  
46  
47

|                                            |      |      |                   |                  |      |      |                   |
|--------------------------------------------|------|------|-------------------|------------------|------|------|-------------------|
| <b>Maternal educational levels</b>         |      |      |                   | <b>&lt;0.001</b> |      |      | <b>&lt;0.001</b>  |
| No education                               | 1307 | 67.7 | 20.4 (16.9, 24.5) |                  | 1257 | 62.7 | 30.9 (26.6, 35.6) |
| Primary                                    | 522  | 27.0 | 28.5 (23.6, 33.9) |                  | 577  | 28.8 | 46.1 (39.8, 52.5) |
| Secondary or higher                        | 102  | 5.3  | 57.3 (44.7, 69.0) |                  | 170  | 8.5  | 70.5 (55.9, 81.8) |
| <b>Household wealth index in quintiles</b> |      |      |                   | <b>&lt;0.001</b> |      |      | <b>&lt;0.001</b>  |
| Poorest                                    | 441  | 22.9 | 16.8 (12.0, 23.0) |                  | 504  | 25.2 | 22.2 (16.1, 29.8) |
| Poorer                                     | 419  | 21.7 | 18.7 (13.9, 24.7) |                  | 396  | 19.8 | 38.1 (30.7, 46.1) |
| Middle                                     | 394  | 20.4 | 18.7 (13.8, 24.7) |                  | 450  | 22.4 | 37.1 (30.1, 44.7) |
| Richer                                     | 369  | 19.1 | 25.1 (18.7, 32.7) |                  | 366  | 18.3 | 44.6 (36.4, 53.0) |
| Richest                                    | 307  | 15.9 | 50.7 (41.5, 59.8) |                  | 288  | 14.4 | 63.0 (52.0, 72.8) |
| <b>Place of residence</b>                  |      |      |                   | <b>&lt;0.001</b> |      |      | <b>&lt;0.001</b>  |
| Urban                                      | 274  | 14.2 | 48.2 (38.8, 57.8) |                  | 232  | 11.6 | 64.6 (51.1, 76.2) |
| Rural                                      | 1656 | 85.8 | 20.6 (17.4, 24.3) |                  | 1772 | 88.4 | 35.2 (31.1, 39.6) |
| <b>Regions</b>                             |      |      |                   | <b>&lt;0.001</b> |      |      | <b>&lt;0.001</b>  |
| Tigray                                     | 129  | 6.7  | 59.3 (50.7, 67.5) |                  | 152  | 7.6  | 67.3 (57.6, 75.7) |
| Afar                                       | 18   | 0.9  | 8.6 (4.9, 14.6)   |                  | 20   | 1.0  | 15.2 (8.0, 26.9)  |
| Amhara                                     | 446  | 23.1 | 27.1 (20.0, 35.6) |                  | 364  | 18.2 | 46.4 (36.7, 56.4) |
| Oromia                                     | 811  | 42.0 | 15.6 (11.1, 21.3) |                  | 881  | 44.0 | 24.7 (18.9, 31.6) |
| Somali                                     | 51   | 2.6  | 17.1 (10.2, 27.2) |                  | 76   | 3.8  | 21.8 (13.8, 32.7) |
| Benishangul-Gumuz                          | 23   | 1.2  | 24.2 (16.8, 33.5) |                  | 21   | 1.0  | 57.4 (47.1, 67.2) |
| Southern Nations, Nationalities and People | 391  | 20.2 | 24.1 (18.0, 31.4) |                  | 419  | 20.9 | 46.9 (38.5, 55.5) |
| Gambela                                    | 8    | 0.4  | 17.4 (8.7, 31.8)  |                  | 5    | 0.3  | 41.1 (30.3, 52.9) |
| Harari                                     | 5    | 0.3  | 36.1 (27.3, 46.0) |                  | 5    | 0.2  | 42.2 (31.1, 54.0) |
| Addis Ababa                                | 43   | 2.2  | 78.7 (69.1, 85.9) |                  | 52   | 2.6  | 89.2 (82.0, 93.8) |
| Dire Dawa                                  | 7    | 0.4  | 59.4 (49.3, 68.8) |                  | 9    | 0.5  | 75.9 (64.2, 84.6) |

## Inequalities in vaccination coverage

Inequalities in child vaccination persisted during 2011 and 2016: basic vaccination status was favourably concentrated among children from wealthier households while the distribution of those who received no vaccination remained disproportionately concentrated among poor (Figure 2). The uptake of BCG, DTP3, OPV3, measles, and basic vaccination were disproportionately concentrated among children from wealthy households during 2011 and 2016 (Figure 3). DTP3 and basic vaccination status had lower coverage and showed the highest inequalities during 2011 and 2016; for example, in 2016, DTP3 had concentration index of (CCI= 0.175) and basic vaccination (CCI= 0.172). The estimate for the distribution of children who received no vaccination in 2011 was (CCI= -0.092), this increased to (CCI= -0.184) in 2016 (Figure 3). The negative values for children who received no vaccination confirms pro-poor distributions. Increased vaccination coverage decreased inequalities as vaccinations such as BCG, OPV3, and measles that had higher coverage showed lower inequalities (Figure 3).

The decomposition results in (Table 3) and (Figure 4) show that the significant contributors to socioeconomic inequality in basic vaccination status included, wealth, maternal education, contraceptive use, antenatal care contacts, exposure to media that include radio and television, and place of residence (rural).

The decomposition analysis showed similar patterns in factors that explain socioeconomic inequalities in child vaccination status on both surveys. The use of maternal health services had the highest significant contributions to socioeconomic inequalities in child vaccination. Antenatal care contacts had 45.4% contribution in 2011 and 50.4% in 2016. Wealth status is the other significant contributor, 23.9% in 2011 and 21.2% in 2016. On the other hand, rural residence had a negative contribution to socioeconomic inequalities in child vaccination on both surveys.

The overall concentration index for basic child vaccination was positive. Any significant positive contributor in (Table 3) and (Figure 4) means that socioeconomic inequality in basic vaccination would have been less pro-rich if: (i) the contributing variables (e.g. antenatal care contacts or wealth) were to be evenly distributed among the rich and poor. Negative contributing variables (e.g. rural residence) would cause the opposite effect. The residual or unexplained contributing

1  
2  
3  
4  
5  
6  
7  
8  
9  
10  
11  
12  
13  
14  
15  
16  
17  
18  
19  
20  
21  
22  
23  
24  
25  
26  
27  
28  
29  
30  
31  
32  
33  
34  
35  
36  
37  
38  
39  
40  
41  
42  
43  
44  
45  
46  
47  
48  
49  
50  
51  
52  
53  
54  
55  
56  
57  
58  
59  
60

factors to socioeconomic inequalities in basic vaccination account for 34.5% in 2011 and -12% in 2016.

For peer review only

Table 3 Decomposition of socioeconomic inequalities in basic vaccination coverage in Ethiopia, (DHS 2011, 2016)

| Study variables                     | 2011            |                     |                       |                         | 2016            |                     |                       |                         |
|-------------------------------------|-----------------|---------------------|-----------------------|-------------------------|-----------------|---------------------|-----------------------|-------------------------|
|                                     | Marginal effect | Concentration index | Absolute contribution | Percentage contribution | Marginal effect | Concentration index | Absolute contribution | Percentage contribution |
| <b>Sex of child</b>                 |                 |                     |                       |                         |                 |                     |                       |                         |
| Male                                | (Base)          | (Base)              | (Base)                | (Base)                  | (Base)          | (Base)              | (Base)                | (Base)                  |
| Female                              | 0.022           | 0.035               | 0.001                 | 0.4                     | 0.043           | 0.034               | 0.001                 | 0.6                     |
| <b>Maternal age</b>                 |                 |                     |                       |                         |                 |                     |                       |                         |
| 15-24                               | (Base)          | (Base)              | (Base)                | (Base)                  | (Base)          | (Base)              | (Base)                | (Base)                  |
| 25-29                               | 0.052*          | 0.049               | 0.003                 | 1.2                     | 0.562           | 0.073               | 0.006                 | 2.2                     |
| 30-34                               | 0.072*          | -0.006              | 0.000                 | -0.2                    | 0.058           | -0.030              | -0.002                | -0.7                    |
| 35-39                               | 0.060*          | -0.052              | -0.003                | -1.5                    | 0.052           | 0.006               | 0.000                 | 0.1                     |
| 40-49                               | 0.023           | 0.019               | 0.000                 | 0.2                     | 0.057*          | -0.009              | -0.001                | -0.2                    |
| <b>Maternal parity</b>              |                 |                     |                       |                         |                 |                     |                       |                         |
| 1                                   | (Base)          | (Base)              | (Base)                | (Base)                  | (Base)          | (Base)              | (Base)                | (Base)                  |
| 2                                   | -0.004          | -0.042              | 0.000                 | 0.1                     | 0.037           | 0.066               | 0.002                 | 0.9                     |
| 3                                   | -0.033          | 0.020               | -0.001                | -0.3                    | 0.014           | -0.009              | 0.000                 | 0.0                     |
| 4                                   | -0.021          | -0.015              | 0.000                 | 0.1                     | 0.016           | -0.034              | -0.001                | -0.2                    |
| 5                                   | -0.068          | -0.012              | 0.001                 | 0.4                     | -0.030          | 0.008               | 0.000                 | -0.1                    |
| 6                                   | -0.034          | -0.048              | 0.002                 | 0.8                     | -0.070          | -0.123              | 0.009                 | 3.2                     |
| <b>Pattern of contraceptive use</b> |                 |                     |                       |                         |                 |                     |                       |                         |
| Never                               | (Base)          | (Base)              | (Base)                | (Base)                  | (Base)          | (Base)              | (Base)                | (Base)                  |
| Using or used before                | 0.091**         | 0.348               | 0.032                 | 15.2                    | 0.235***        | 0.322               | 0.076                 | 28.5                    |
| <b>Antenatal care contact</b>       |                 |                     |                       |                         |                 |                     |                       |                         |
| No                                  | (Base)          | (Base)              | (Base)                | (Base)                  | (Base)          | (Base)              | (Base)                | (Base)                  |
| Yes                                 | 0.242***        | 0.390               | 0.094                 | 45.4                    | 0.566***        | 0.237               | 0.134                 | 50.4                    |
| <b>Place child was delivered</b>    |                 |                     |                       |                         |                 |                     |                       |                         |
| Home                                | (Base)          | (Base)              | (Base)                | (Base)                  | (Base)          | (Base)              | (Base)                | (Base)                  |
| Health facility                     | 0.030*          | 0.323               | 0.010                 | 4.6                     | 0.027*          | 0.371               | 0.010                 | 3.7                     |

1  
2  
3  
4  
5  
6  
7  
8  
9  
10  
11  
12  
13  
14  
15  
16  
17  
18  
19  
20  
21  
22  
23  
24  
25  
26  
27  
28  
29  
30  
31  
32  
33  
34  
35  
36  
37  
38  
39  
40  
41  
42  
43  
44  
45  
46  
47

**Frequency of listening to radio**

|                       |        |        |        |        |        |        |        |        |
|-----------------------|--------|--------|--------|--------|--------|--------|--------|--------|
| Not at all            | (Base) |
| Less than once a week | -0.031 | 0.104  | -0.003 | -1.6   | 0.049  | 0.127  | 0.006  | 2.3    |
| At least once a week  | 0.026* | 0.232  | 0.006  | 2.9    | 0.045  | 0.219  | 0.010  | 3.7    |

**Frequency of watching television**

|                       |        |        |        |        |        |        |        |        |
|-----------------------|--------|--------|--------|--------|--------|--------|--------|--------|
| Not at all            | (Base) |
| Less than once a week | -0.035 | 0.066  | -0.002 | -1.1   | -0.008 | 0.120  | -0.001 | -0.3   |
| At least once a week  | 0.042  | 0.223  | 0.009  | 4.5    | 0.007  | 0.286  | 0.002  | 0.7    |

**Education levels**

|                     |        |        |        |        |         |        |        |        |
|---------------------|--------|--------|--------|--------|---------|--------|--------|--------|
| No education        | (Base) | (Base) | (Base) | (Base) | (Base)  | (Base) | (Base) | (Base) |
| Primary             | -0.005 | 0.182  | -0.001 | -0.4   | 0.070** | 0.127  | 0.009  | 3.3    |
| Secondary or higher | -0.001 | 0.152  | 0.000  | 0.0    | 0.028** | 0.235  | 0.007  | 2.5    |

**Place of residence**

|       |        |        |        |        |        |        |        |        |
|-------|--------|--------|--------|--------|--------|--------|--------|--------|
| Urban | (Base) |
| Rural | 0.143  | -0.426 | -0.061 | -29.2  | 0.080  | -0.323 | -0.026 | -9.8   |

**Household wealth index in quintiles**

|          |          |        |        |        |         |        |        |        |
|----------|----------|--------|--------|--------|---------|--------|--------|--------|
| Poorest  | (Base)   | (Base) | (Base) | (Base) | (Base)  | (Base) | (Base) | (Base) |
| Poorer   | 0.005    | -0.283 | -0.001 | -0.7   | 0.094** | -0.236 | -0.022 | -8.3   |
| Middle   | -0.015*  | 0.078  | -0.001 | -0.6   | 0.061** | 0.110  | 0.007  | 2.5    |
| Richer   | 0.032**  | 0.375  | 0.012  | 5.8    | 0.070** | 0.387  | 0.027  | 10.2   |
| Richest  | 0.076*** | 0.535  | 0.040  | 19.4   | 0.091** | 0.492  | 0.045  | 16.8   |
| Residual |          |        |        | 34.6   |         |        |        | -12.1  |
| Total    |          |        |        | 65.4   |         |        |        | 112.1  |

\* indicates <p 0.05; \*\* indicates p < 0.01; \*\*\* indicates p < 0.001

## Discussion

This study examined inequalities in vaccination coverage among children aged 12-23 months in Ethiopia. The uptake of all basic vaccinations increased from 24.6% in 2011 to 38.6% in 2016. Coverage improvements from 2011 to 2016 were observed in BCG vaccine uptake by 3%, DTP3 by 16.2%, OPV3 by 11.5%, and all basic vaccinations by 14%. While there were improvements in vaccination coverage from 2011 to 2016, issues that need to be address include a lack of awareness about vaccination, facilities' limited operating hours, maternal time constraints, and the distance to facilities <sup>34,35</sup>.

Ethiopia remains one of the top ten high priority countries in the world where children remain unvaccinated <sup>1</sup>. In the current study, more than 15% of children received none of the vaccines, while incomplete vaccinations were 62% in 2011 and 46% in 2016. Possible explanations for under vaccination or no vaccination may include vaccine hesitancy or refusal, lack of access to vaccination services, or missed opportunities <sup>5</sup>. Vaccine hesitancy refers to concerns about real or perceived vaccine adverse events among parents that may lead to delayed vaccination schedules or refusal of vaccinations altogether <sup>36</sup>. Missed opportunities present another explanation in which children may not receive one or all of recommended vaccines even if they are vaccine-eligible and can attend health facilities, which is commonly refers to missed opportunities <sup>5,36</sup>.

The uptake of BCG, DTP3, OPV3, measles, and receipt of all basic vaccinations were disproportionately concentrated among children from wealthier households. This finding is consistent with multi country studies across low-middle income countries.<sup>9,37</sup> However, a study across three countries <sup>14</sup> that include Gambia, Kyrgyz Republic, and Namibia showed that receipt of all basic vaccinations was disproportionately concentrated among children from poor households. The coverage of DTP3 and basic vaccination showed the highest inequalities favouring children from wealthy households. More than 14% of children received none of the vaccines during 2011 and 2016. These children were mainly from disadvantaged households; for example, children who remained unvaccinated in 2016 were 8.3% among the richest quantile, while 24% were from the poorest quantile. Basic vaccination coverage also showed significant



1  
2  
3 variations across regions of the country; this ranged from 15% in Afar, and 21% in Somali, to  
4 67.3% in Tigray, and 89.2% in Addis Ababa. Afar and Somali regions are predominantly nomadic  
5 pastoralist areas, with relatively weaker health systems compared to Tigray, and Addis Ababa  
6 that have improved healthcare coverage <sup>38</sup>.

7  
8  
9  
10  
11 Ensuring access to all recommended vaccines for all children, regardless of sociodemographic or  
12 socioeconomic status, saves more lives and facilitates progress towards achieving sustainable  
13 development goals (SDGs) <sup>39</sup>. SDG target for child mortality aims to reduce neonatal mortality to  
14 lower than 12 deaths per 1,000 live births and under-5 mortality to lower than 25 deaths per  
15 1,000 live births across all countries <sup>39</sup>. In 2016, the infant mortality rate was 48 deaths per 1,000  
16 live births, and the under-5 mortality rate was 67 deaths per 1,000 live births in Ethiopia <sup>23</sup>.

17  
18  
19 Findings of the current study revealed that the use of maternal health services, maternal  
20 education, exposure to media, and wealth had positive contributions to basic vaccination uptake.  
21 These findings align with other similar studies <sup>11,15,40</sup>. Maternal knowledge about vaccinations is  
22 a determinant for vaccination status, which may be associated with increased knowledge about  
23 benefits of child vaccination because of counselling during family planning, and antenatal care  
24 contacts <sup>41-43</sup>. Moreover, based on findings related to the impact of residence and access to  
25 health facilities on vaccination, it may be that a mother with regular access to family planning  
26 and antenatal care is also more likely to seek out postnatal care where vaccination of her child  
27 can be more readily provided <sup>44</sup>.

28  
29  
30  
31  
32  
33  
34  
35  
36  
37  
38  
39  
40  
41  
42  
43  
44  
45  
46  
47  
48  
49  
50  
51  
52  
53  
54  
55  
56  
57  
58  
59  
60  
In the present study, maternal education had contributions to vaccine uptake in 2016, but this  
was not the case in 2011. Education helps to create improved awareness and knowledge about  
childhood vaccination <sup>42</sup>. Previous studies have also indicated that educated women are more  
likely to take their child for vaccination <sup>13,42</sup>. Exposure to media can also be a useful tool to reach  
population at different socioeconomic levels. The findings of this study showed that access to  
mass media (radio and TV) favourably influences vaccine uptake. Transmitting information about  
the importance of childhood vaccination is vital to reach not only mothers but also their partners  
and community leaders <sup>45</sup>. Information dissemination that targets mother's partner and

1  
2  
3 community leaders can help to create a conducive environment that can favourably influence  
4 mothers to vaccinate their children.  
5  
6

7  
8 In the present study, the socioeconomic well-being of mothers was associated with higher  
9 vaccination uptake. While vaccinations are provided free of charge in many developing countries,  
10 mothers sometimes incur indirect costs, for example, transportation costs, which often limit their  
11 uptake of these services <sup>6</sup>. Mothers at the lower wealth categories are more likely to experience  
12 challenges in accessing healthcare facilities as such less likely to take their child for vaccination  
13  
14  
15  
16  
17 <sup>11</sup>.

18  
19 Children from rural areas had lower vaccination coverage compared to children from urban  
20 areas. In 2011, basic vaccination coverage was 48.2% in urban areas while it was 20.6% in rural  
21 areas. This pattern continued in 2016, as 64.6% of children from urban areas had basic  
22 vaccination, but only 35.2% in rural areas. This finding is consistent with those of similar studies  
23 <sup>11,46</sup>. This could partly be explained by challenges faced in rural areas due to less developed health  
24 infrastructure and fewer skilled providers <sup>47</sup>. In rural areas, long-distance to health facilities is  
25 another reason for low basic vaccination coverage. People live far away from health facilities and  
26 the long-distance, and lack of transportation poses a critical challenge for mothers to take their  
27 child for vaccination <sup>47</sup>. Vaccines require cold chain management as it is sensitive to high  
28 temperatures <sup>48</sup>. Health facilities in rural areas face a shortage of electric power supply to keep  
29 the cold chain equipment working, which could lead to cancellation of services as lack of cold  
30 chain equipment may result in the stock-out of vaccines <sup>15</sup>. One study from Nigeria found that  
31 47% of solar fridges for vaccine storage in eight states were broken <sup>49</sup>.  
32  
33  
34  
35  
36  
37  
38  
39  
40  
41  
42  
43

44 The strengths of this study include the use of a nationally representative survey from the two  
45 most recent DHS surveys. The decomposition of the contributing factors that drive  
46 socioeconomic inequalities in vaccination status provided a rich set of analysis for policy  
47 interventions to address socioeconomic disparities in access to basic vaccinations in Ethiopia.  
48 Limitations of the current study may include recall bias related to vaccination status as not all  
49 children had vaccination cards, and measures had to depend on the mother's verbal report. The  
50  
51  
52  
53  
54  
55  
56  
57

1  
2  
3 DHS is a cross-sectional survey; it was not possible to establish temporality between childhood  
4 vaccination and explanatory factors..  
5  
6  
7  
8  
9

## 10 Conclusions

11 The coverage of basic vaccination improved by 14 % from 2011 to 2016, but the overall coverage  
12 remained low. Increased vaccine coverage was disproportionately concentrated among children  
13 from wealthy households, while the majority of children who had no vaccination were from  
14 disadvantaged households. Utilisation of reproductive and maternal health services, household  
15 income status, and maternal education had significant positive contributions to improved  
16 vaccination status. Therefore, continued efforts at improving coverage of family planning,  
17 antenatal care contacts, institutional delivery, maternal education, and socioeconomic well-  
18 being are required to improve vaccination status. Moreover, regions such as Afar, Somali, and  
19 Oromia, and rural areas of the country at large require targeting.  
20  
21  
22  
23  
24  
25  
26  
27  
28  
29  
30  
31  
32  
33  
34  
35  
36  
37  
38  
39  
40  
41  
42  
43  
44  
45  
46  
47  
48  
49  
50  
51  
52  
53  
54  
55  
56  
57

### Acknowledgements:

Authors are grateful to ICF International for implementing the MEASURE DHS and making the data available for public use. United States Agency for International Development (USAID) funded the MEASURE DHS project.

### Funding:

There was no particular funding received for this study.

### Competing interests:

None declared

### Patient consent for publication:

Not required

### Ethics approval:

Ethics approval was not required for the current analysis, as the data were from publicly available DHS data. The MEASURE DHS /ICF International, Rockville, Maryland, USA – granted access to data upon request.

### Contributors

FTB designed the study, analysed and drafted the manuscript. AH helped revise the study design, and supervised the data analysis. All authors read and approved the final manuscript.

### Data availability statement:

The dataset was made available for public use after de-identification (data are available online at: <https://www.idhsdata.org/idhs/>)

## References

1. World Health Organization. Immunization coverage 2019. <https://www.who.int/news-room/fact-sheets/detail/immunization-coverage> [accessed January 19, 2019].
2. Arsenault C, Harper S, Nandi A, Mendoza Rodriguez JM, Hansen PM, Johri M. Monitoring equity in vaccination coverage: A systematic analysis of demographic and health surveys from 45 Gavi-supported countries. *Vaccine*. 2017;35(6):951-9.
3. Arsenault C, Harper S, Nandi A, Rodriguez JM, Hansen PM, Johri M. An equity dashboard to monitor vaccination coverage. *Bull World Health Organ*. 2017;95(2):128-34.
4. Federal Ministry of Health. A ETHIOPIA NATIONAL EXPANDED PROGRAMME ON IMMUNIZATION. April, 2015.
5. Porth JM, Wagner AL, Teklie H, Abeje Y, Moges B, Boulton ML. Vaccine non-receipt and refusal in Ethiopia: The expanded program on immunization coverage survey, 2012. *Vaccine*. 2019;37(15):2106-21.
6. Organization WH. State of Inequality: Reproductive Maternal Newborn and Child Health: Interactive Visualization of Health Data: World Health Organization; 2015.
7. Victora CG, Requejo JH, Barros AJ, Berman P, Bhutta Z, Boerma T, et al. Countdown to 2015: a decade of tracking progress for maternal, newborn, and child survival. 2016;387(10032):2049-59.
8. Arsenault C, Johri M, Nandi A, Mendoza Rodriguez JM, Hansen PM, Harper S. Country-level predictors of vaccination coverage and inequalities in Gavi-supported countries. *Vaccine*. 2017;35(18):2479-88.
9. Hosseinpoor AR, Bergen N, Schlottheuber A, Gacic-Dobo M, Hansen PM, Senouci K, et al. State of inequality in diphtheria-tetanus-pertussis immunisation coverage in low-income and middle-income countries: a multicountry study of household health surveys. *The Lancet Global Health*. 2016;4(9):e617-e26.
10. Shrivastwa N, Gillespie BW, Kolenic GE, Lepkowski JM, Boulton ML. Predictors of vaccination in India for children aged 12–36 months. *American journal of preventive medicine*. 2015;49(6):S435-S44.
11. Ataguba JE, Ojo KO, Ichoku HE. Explaining socio-economic inequalities in immunization coverage in Nigeria. *Health Policy Plan*. 2016;31(9):1212-24.
12. Branco FLCC, Pereira TM, Delfino BM, Braña AM, Oliart-Guzmán H, Mantovani SAS, et al. Socioeconomic inequalities are still a barrier to full child vaccine coverage in the Brazilian Amazon: a cross-sectional study in Assis Brasil, Acre, Brazil. *International journal for equity in health*. 2014;13(1):118.
13. Acharya K, Paudel YR, Dharel D. The trend of full vaccination coverage in infants and inequalities by wealth quintile and maternal education: analysis from four recent demographic and health surveys in Nepal. *BMC Public Health*. 2019;19(1).
14. Hajizadeh M. Decomposing socioeconomic inequality in child vaccination in the Gambia, the Kyrgyz Republic and Namibia. *Vaccine*. 2019;37(44):6609-16.
15. McGavin ZA, Wagner AL, Carlson BF, Power LE, Eboreime E, Boulton ML. Childhood full and under-vaccination in Nigeria, 2013. *Vaccine*. 2018;36(48):7294-9.
16. Sachs JD. From millennium development goals to sustainable development goals. *The Lancet*. 2012;379(9832):2206-11.
17. Tangcharoensathien V, Mills A, Palu T. Accelerating health equity: the key role of universal health coverage in the Sustainable Development Goals. *BMC medicine*. 2015;13(1):101.
18. Ethiopian Public Health Institute (EPHI) [Ethiopia] and ICF. Ethiopia Mini Demographic and Health Survey 2019: Key Indicators. Rockville, Maryland, USA: EPHI and ICF.; 2019.
19. World Health Organization. Regional Strategic Plan for Immunization 2014-2020: World Health Organization. Regional Office for Africa; 2015.

20. Mekonnen AG, Bayleyegn AD, Ayele ET. Immunization coverage of 12-23 months old children and its associated factors in Minjar-Shenkora district, Ethiopia: a community-based study. *BMC Pediatr.* 2019;19(1):198.
21. Tamirat KS, Sisay MM. Full immunization coverage and its associated factors among children aged 12-23 months in Ethiopia: further analysis from the 2016 Ethiopia demographic and health survey. *BMC Public Health.* 2019;19(1):1019.
22. Wondimu A, Cao Q, Wilschut JC, Postma MJ. Factors associated with the uptake of newly introduced childhood vaccinations in Ethiopia: the cases of rotavirus and pneumococcal conjugate vaccines. *BMC Public Health.* 2019;19(1):1656.
23. Central Statistical Agency (CSA) [Ethiopia], ICF. Ethiopia Demographic and Health Survey 2016.: Addis Ababa, Ethiopia, and Rockville, Maryland, USA: CSA and ICF; 2016.
24. The DHS Program. The DHS Overview. <https://dhsprogram.com/What-We-Do/Survey-Types/DHS.cfm>
25. The DHS Program. DHS Methodology. <https://dhsprogram.com/What-We-Do/Survey-Types/DHS-Methodology.cfm>.
26. The DHS Program. DHS Questionnaires. <https://dhsprogram.com/What-We-Do/Survey-Types/DHS-Questionnaires.cfm>.
27. Rutstein SO, Rojas G. Guide to DHS statistics. Calverton, MD: ORC Macro. 2006;38.
28. Restrepo-Mendez MC, Barros AJ, Wong KL, Johnson HL, Pariyo G, Franca GV, et al. Inequalities in full immunization coverage: trends in low- and middle-income countries. *Bull World Health Organ.* 2016;94(11):794-805B.
29. Solar O, Irwin A. A conceptual framework for action on the social determinants of health. 2010.
30. Ashish K, Nelin V, Raaijmakers H, Kim HJ, Singh C, Målqvist MJBotWHO. Increased immunization coverage addresses the equity gap in Nepal. 2017;95(4):261.
31. Doherty E, Walsh B, O'Neill C. Decomposing socioeconomic inequality in child vaccination: results from Ireland. *Vaccine.* 2014;32(27):3438-44.
32. O'Donnell O, Van Doorslaer E, Wagstaff A, Lindelow M. Analyzing health equity using household survey data: a guide to techniques and their implementation: The World Bank; 2007.
33. Wagstaff A, Doorslaer vE, Watanabe N. On decomposing the causes of health sector inequalities with an application to malnutrition inequalities in Vietnam: The World Bank; 2001.
34. Legesse E, Dechasa W. An assessment of child immunization coverage and its determinants in Sinana District, Southeast Ethiopia. *BMC pediatrics.* 2015;15(1):31.
35. Tadesse H, Deribew A, Woldie M. Explorative assessment of factors affecting child immunization in Wonago district, Gedeo zone, South Ethiopia. *Archives of Medical Science.* 2009;5(2):233.
36. Sadaf A, Richards JL, Glanz J, Salmon DA, Omer SB. A systematic review of interventions for reducing parental vaccine refusal and vaccine hesitancy. *Vaccine.* 2013;31(40):4293-304.
37. Hajizadeh M. Socioeconomic inequalities in child vaccination in low/middle-income countries: what accounts for the differences? *J Epidemiol Community Health.* 2018;72(8):719-25.
38. Federal Democratic Republic of Ethiopia [Ministry of Health]. Health Sector Transformation Plan (HSTP) 2015/16-2019/20 (2008-2012 EFY). Federal Democratic Republic of Ethiopia Ministry of Health; 2015.
39. UN. Transforming our world: the 2030 Agenda for Sustainable Development. Resolution A/RES/70/1. Adopted September, 2015. Geneva: United Nations, 2015. 2015.
40. Mbengue MAS, Sarr M, Faye A, Badiane O, Camara FBN, Mboup S, et al. Determinants of complete immunization among senegalese children aged 12-23 months: evidence from the demographic and health survey. *BMC Public Health.* 2017;17(1):630.

- 1  
2  
3 41. Bhutta ZA, Das JK, Bahl R, Lawn JE, Salam RA, Paul VK, et al. Can available interventions end  
4 preventable deaths in mothers, newborn babies, and stillbirths, and at what cost? *The Lancet*.  
5 2014;384(9940):347-70.  
6 42. Burroway R, Hargrove A. Education is the antidote: Individual- and community-level effects of  
7 maternal education on child immunizations in Nigeria. *Soc Sci Med*. 2018;213:63-71.  
8 43. Bobo FT, Yesuf EA, Woldie M. Inequities in utilization of reproductive and maternal health  
9 services in Ethiopia. *Int J Equity Health*. 2017;16(1):105.  
10 44. Kerber KJ, de Graft-Johnson JE, Bhutta ZA, Okong P, Starrs A, Lawn JE. Continuum of care for  
11 maternal, newborn, and child health: from slogan to service delivery. *Lancet*. 2007;370(9595):1358-69.  
12 45. Zamawe CO, Banda M, Dube ANJBp, childbirth. The impact of a community driven mass media  
13 campaign on the utilisation of maternal health care services in rural Malawi. 2016;16(1):21.  
14 46. Raza O, Lodhi FS, Morasae EK, Majdzadeh R. Differential achievements in childhood  
15 immunization across geographical regions of Pakistan: analysis of wealth-related inequality. *Int J Equity*  
16 *Health*. 2018;17(1):122.  
17 47. Organization WH. State of inequality: childhood immunization. 2016.  
18 48. Kartoglu U, Milstien J. Tools and approaches to ensure quality of vaccines throughout the cold  
19 chain. *Expert Rev Vaccines*. 2014;13(7):843-54.  
20 49. Ophori EA, Tula MY, Azih AV, Okojie R, Ikpo PE. Current trends of immunization in Nigeria:  
21 prospect and challenges. *Trop Med Health*. 2014;42(2):67-75.  
22  
23  
24  
25  
26  
27

## 28 Figures

29  
30  
31 Fig. 1 Vaccination coverage among children aged 12-23 months in Ethiopia (DHS 2011, 2016).  
32

33 Fig. 2 Concentration curves for child vaccination status, Ethiopia (DHS 2011, 2016)  
34

35 Fig. 3 Concentration indices that shows socioeconomic inequalities in child vaccinations, Ethiopia (DHS  
36 2011, 2016)  
37

38 2Fig. 4 Percentage contributions of factors explaining socioeconomic inequalities in full vaccination  
39 coverage, Ethiopia (DHS 2011, 2016)  
40  
41  
42  
43  
44  
45  
46  
47  
48  
49  
50  
51  
52  
53  
54  
55  
56  
57



Fig. 1 Vaccination coverage among children aged 12-23 months in Ethiopia (DHS 2011, 2016).





Fig. 2 Concentration curves for child vaccination status, Ethiopia (DHS 2011, 2016)



Fig. 3 Concentration indices that shows socioeconomic inequalities in child vaccinations, Ethiopia (DHS 2011, 2016)



Fig. 4 Percentage contributions of factors explaining socioeconomic inequalities in full vaccination coverage, Ethiopia (DHS 2011, 2016)

1  
2  
3 **Health Insurance Coverage and Associated Factors among Women in Ethiopia: A Secondary Analysis of Ethiopia**  
4 **Demographic and Health Survey Data 2016 – STROBE checklist**  
5

|                             | Page No | Recommendation                                                                                                                                                                                                                                                                                                                             |
|-----------------------------|---------|--------------------------------------------------------------------------------------------------------------------------------------------------------------------------------------------------------------------------------------------------------------------------------------------------------------------------------------------|
| <b>Title and abstract</b>   | 1 – 3   | (a) Indicate the study's design with a commonly used term in the title or the abstract<br>(b) Provide in the abstract an informative and balanced summary of what was done and what was found                                                                                                                                              |
| <b>Introduction</b>         |         |                                                                                                                                                                                                                                                                                                                                            |
| Background/rationale        | 4       | Explain the scientific background and rationale for the investigation being reported                                                                                                                                                                                                                                                       |
| Objectives                  | 4       | State specific objectives, including any prespecified hypotheses                                                                                                                                                                                                                                                                           |
| <b>Methods</b>              |         |                                                                                                                                                                                                                                                                                                                                            |
| Study design                | 5       | Present key elements of study design early in the paper                                                                                                                                                                                                                                                                                    |
| Setting                     | 5       | Describe the setting, locations, and relevant dates, including periods of recruitment, exposure, follow-up, and data collection                                                                                                                                                                                                            |
| Participants                | 5       | (a) Give the eligibility criteria, and the sources and methods of selection of Participants                                                                                                                                                                                                                                                |
| Variables                   | 5-6     | Clearly define all outcomes, exposures, predictors, potential confounders, and effect Modifiers. Give diagnostic criteria, if applicable                                                                                                                                                                                                   |
| Data sources/<br>measuremen | 5       | For each variable of interest, give sources of data and details of methods of assessment (measurement). Describe comparability of assessment methods if there is                                                                                                                                                                           |
| Bias                        | 7       | Describe any efforts to address potential sources of bias                                                                                                                                                                                                                                                                                  |
| Study size                  | 5       | Explain how the study size was arrived at                                                                                                                                                                                                                                                                                                  |
| Quantitative variables      | 5-6     | Explain how quantitative variables were handled in the analyses. If applicable, describe which groupings were chosen and why                                                                                                                                                                                                               |
| Statistical methods         | 6-7     | (a) Describe all statistical methods, including those used to control for confounding<br>(b) Describe any methods used to examine subgroups and interactions<br>(c) Explain how missing data were addressed<br>(d) If applicable, describe analytical methods taking account of sampling strategy<br>(e) Describe any sensitivity analyses |
| <b>Results</b>              |         |                                                                                                                                                                                                                                                                                                                                            |
| Participants                | 8       | (a) Report numbers of individuals at each stage of study—eg numbers potentially eligible, examined for eligibility, confirmed eligible, included in the study, completing follow-up, and analysed<br>(b) Give reasons for non-participation at each stage<br>(c) Consider use of a flow diagram                                            |
| Descriptive data            | 8-10    | (a) Give characteristics of study participants (eg demographic, clinical, social) and information on exposures and potential confounders<br>(b) Indicate number of participants with missing data for each variable of interest                                                                                                            |
| Outcome data                | 11-12   | Report numbers of outcome events or summary measures                                                                                                                                                                                                                                                                                       |
| Main results                | 10-14   | (a) Give unadjusted estimates and, if applicable, confounder-adjusted estimates and their precision (eg, 95% confidence interval). Make clear which confounders were<br>(b) Report category boundaries when continuous variables were categorized                                                                                          |

1  
2  
3  
4  
5  
6  
7  
8  
9  
10  
11  
12  
13  
14  
15  
16  
17  
18  
19  
20  
21  
22  
23  
24  
25  
26  
27  
28  
29  
30  
31  
32  
33  
34  
35  
36  
37  
38  
39  
40  
41  
42  
43  
44  
45  
46  
47  
48  
49  
50  
51  
52  
53  
54  
55  
56  
57  
58  
59  
60

|                          |       |                                                                                                                                                                            |
|--------------------------|-------|----------------------------------------------------------------------------------------------------------------------------------------------------------------------------|
|                          |       | (c) If relevant, consider translating estimates of relative risk into absolute risk for a meaningful time period                                                           |
| Other analyses           | N/A   | Report other analyses done—eg analyses of subgroups and interactions, and sensitivity analyses                                                                             |
| Discussion               |       |                                                                                                                                                                            |
| Key results              | 13-17 | Summarise key results with reference to study objectives                                                                                                                   |
| Limitations              | 3     | Discuss limitations of the study, taking into account sources of potential bias or                                                                                         |
| Interpretation           | 13-17 | Give a cautious overall interpretation of results considering objectives, limitations, multiplicity of analyses, results from similar studies, and other relevant evidence |
| Generalisability         | 3     | Discuss the generalisability (external validity) of the study results                                                                                                      |
| <b>Other information</b> | N/A   | Give the source of funding and the role of the funders for the present study and, if applicable, for the original study on which the present article is based              |
| Funding                  |       |                                                                                                                                                                            |
